# Supplementary material for: Targeted Sequence Capture Provides Insight into Genome Structure and Genetics of Male Sterility in a Gynodioecious Diploid Strawberry, Fragaria vesca ssp. bracteata (Rosaceae)
Source: PubMed Central journal article supplement (PMC3737174; doi:10.1534/g3.113.006288), 2013-08-01
Supplement: supp_g3.113.006288_006288SI.pdf [file supp_g3.113.006288_006288SI.pdf]

**Targeted sequence capture provides insight into genome structure and genetics of male sterility in a gynodioecious diploid strawberry, *Fragaria vesca* ssp. *bracteata* (Rosaceae)**

Jacob A. Tennesen<sup>\*</sup>, Rajanikanth Govindarajulu<sup>§</sup>, Aaron Liston<sup>†</sup> and Tia-Lynn Ashman<sup>§,1</sup>

<sup>\*</sup>Department of Zoology and <sup>†</sup>Department of Botany and Plant Pathology, Oregon State University, Corvallis, OR 97331, <sup>§</sup>Department of Biological Sciences, University of Pittsburgh, Pittsburgh, PA 15260

<sup>1</sup>Corresponding author: University of Pittsburgh, Department of Biological Sciences, 215 Clapp Hall, 4249 Fifth Avenue, Pittsburgh, PA 15260. E-mail: tia1@pitt.edu

**DOI: 10.1534/g3.113.006288**

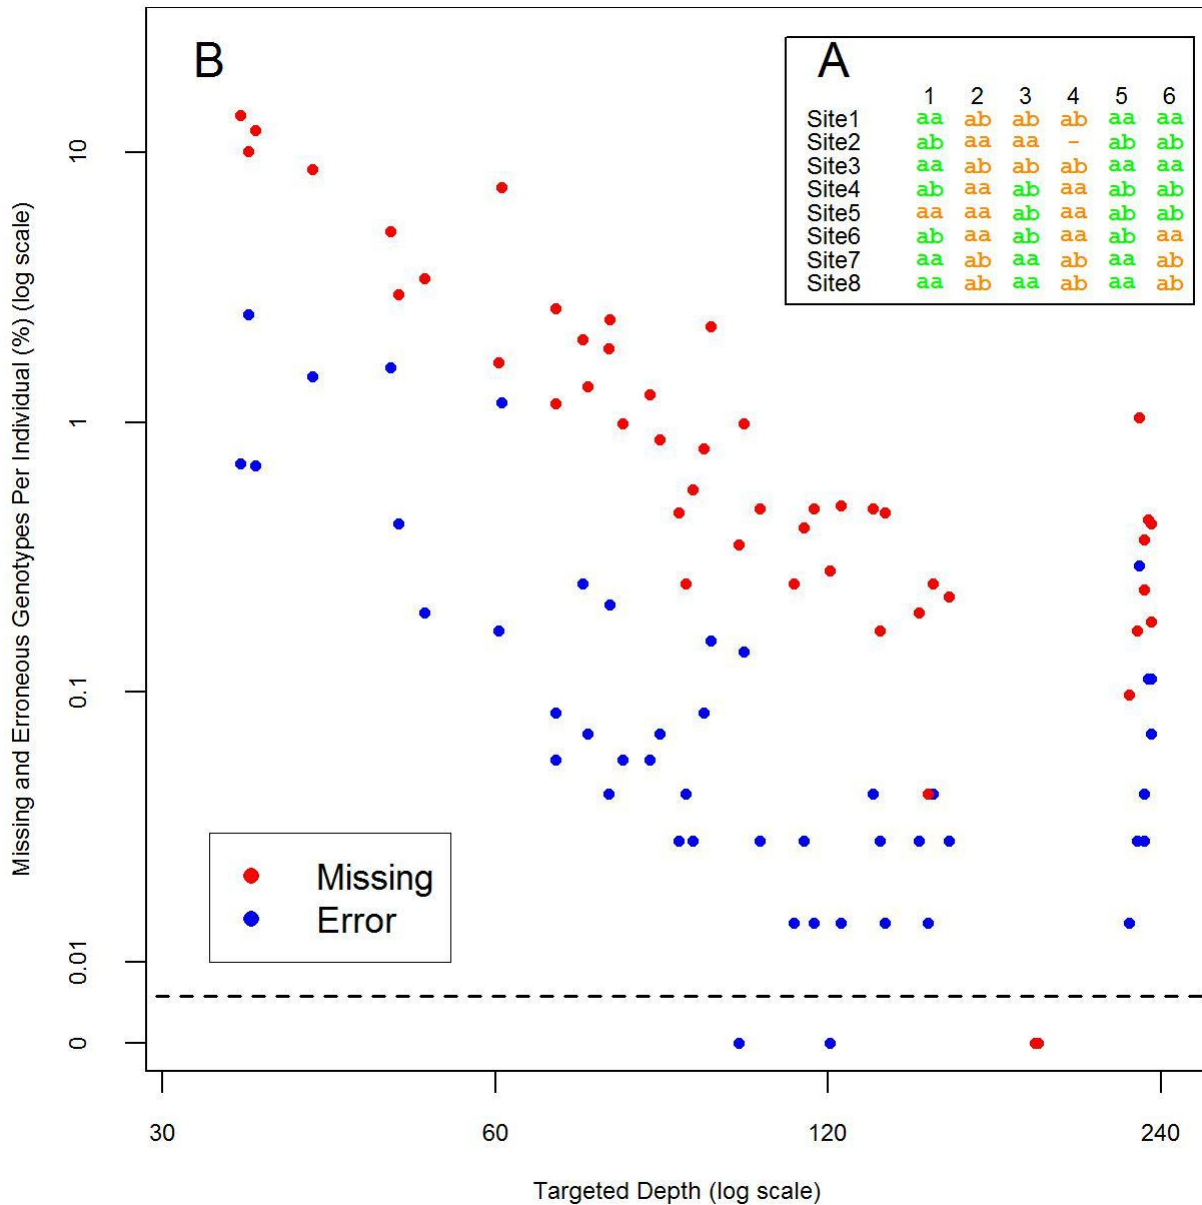

**Figure S1** Genotyping errors and missing data. (A) Genotyping errors were identified as anomalies in the linkage map, as shown in this example genotype alignment. Heterozygotes are “ab”, homozygotes are “aa”, and missing data is “-”. Rows are informative sites and columns are individual offspring. Individual 1 has an anomalous genotype at Site 5, in that it does not match what it expected based on the genotypes at Site 4 and Site 6. We would call such a genotype an error rather than a double recombination event. In contrast, the recombination event in Individual 6 that occurs between Site 5 and Site 6 appears to be real because it is supported by multiple sites. Individual 4 has missing data at Site 2 (did not pass quality filter based on Phred-scaled likelihood > 40 for alternate genotypes). (B) Scatterplot of missing data and genotyping errors per individual as a function of coverage (mean depth at targeted sites). We observed low per-individual rates of both missing data (mean = 2.1%; median = 0.6%) and genotyping errors (mean = 0.2%; median = 0.05%). Targeted depth was negatively correlated with both genotyping error ( $r_s = -0.60$ ;  $P < 10^{-05}$ ) and missing data ( $r_s = -0.85$ ;  $P < 10^{-14}$ ). For 8 offspring sequenced a separate lane, coverage was much higher (>200x) than for the remaining 40 offspring (Table S1).

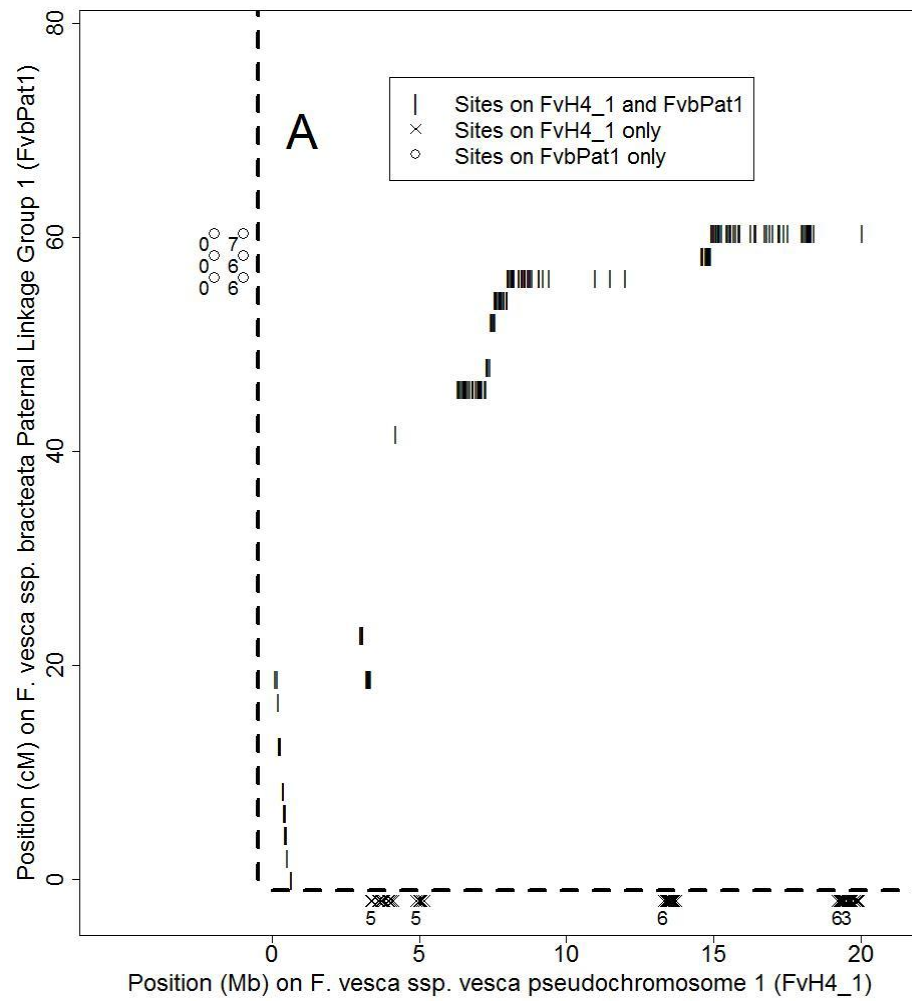

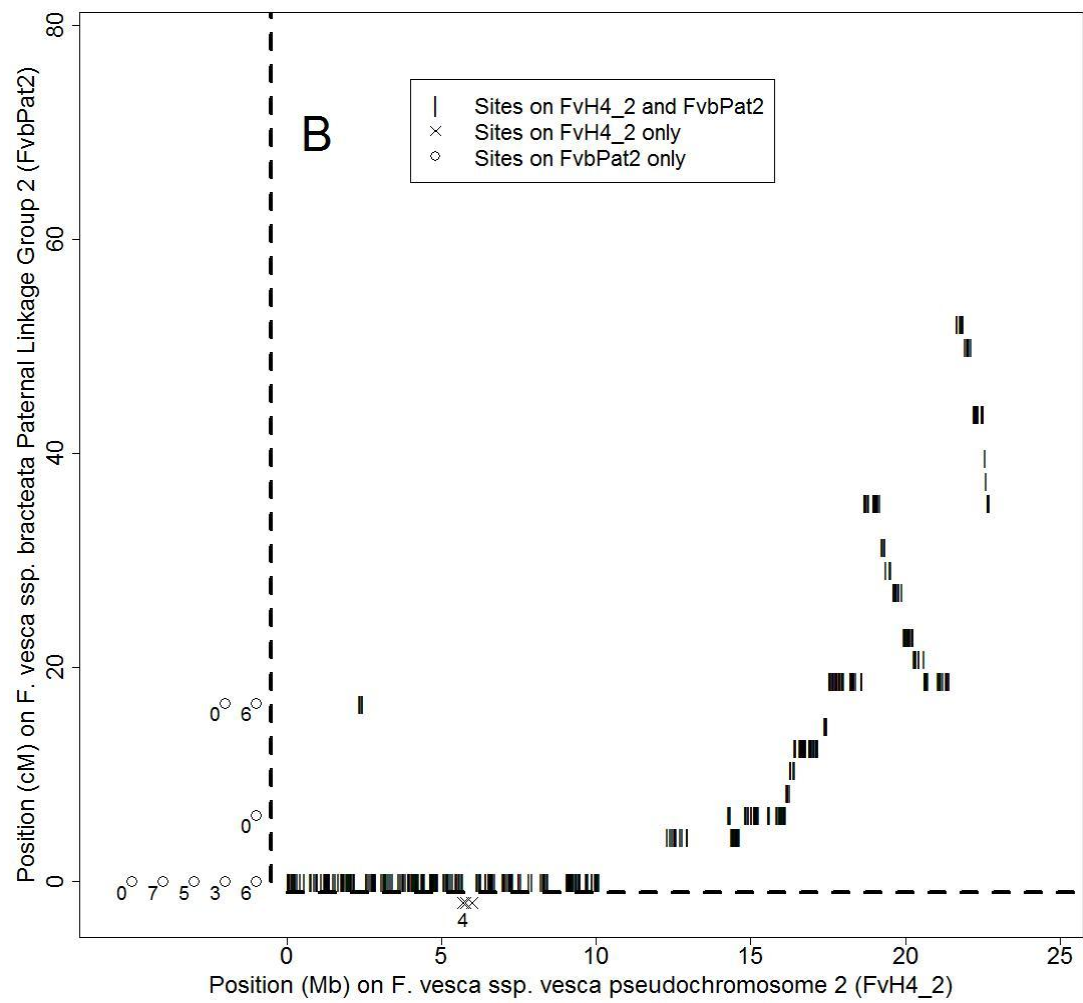

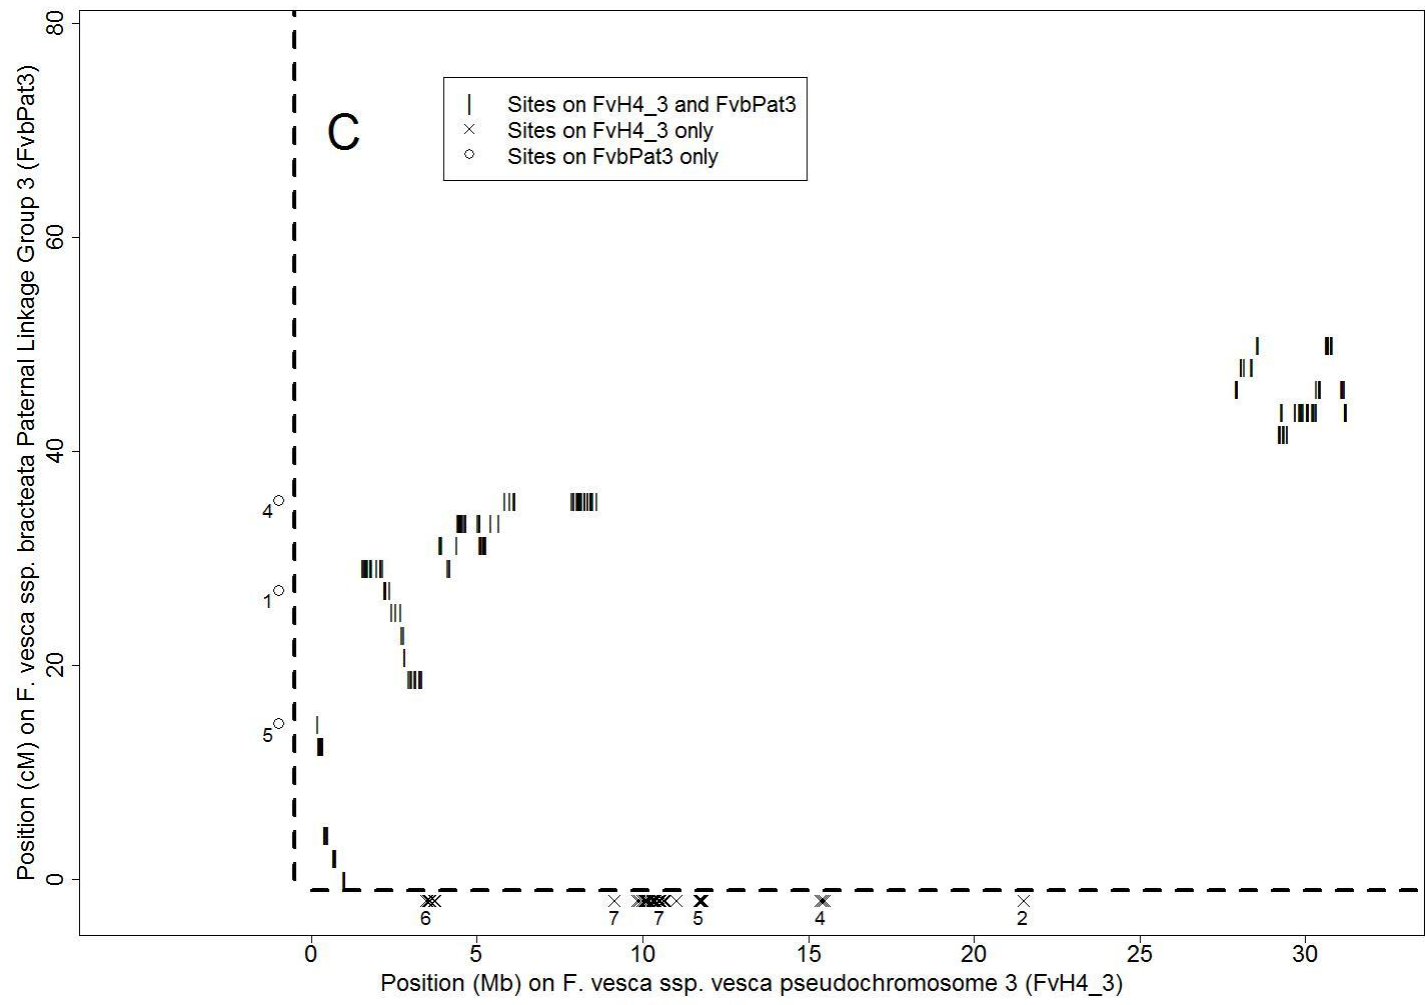



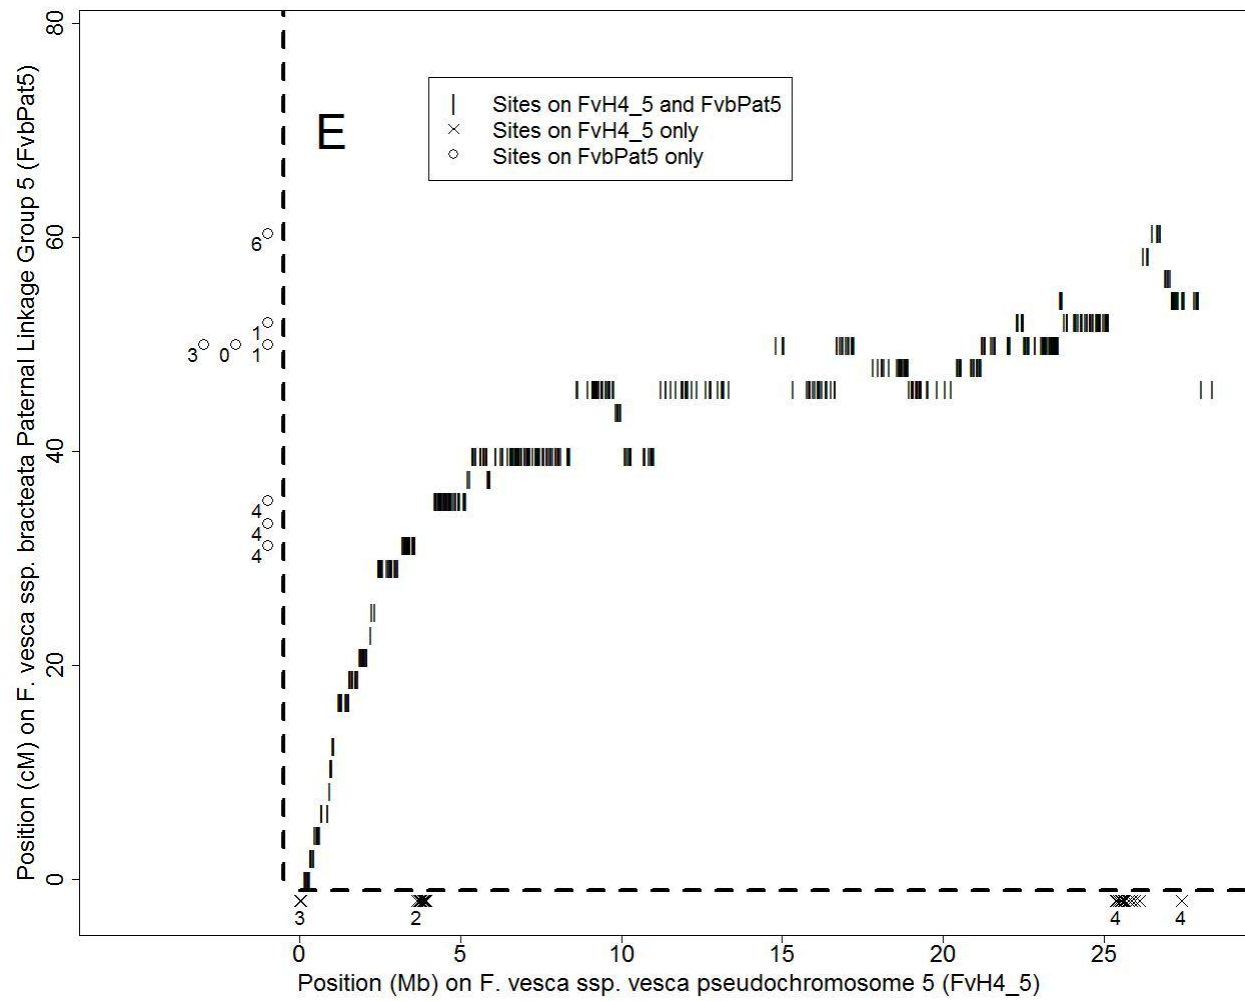

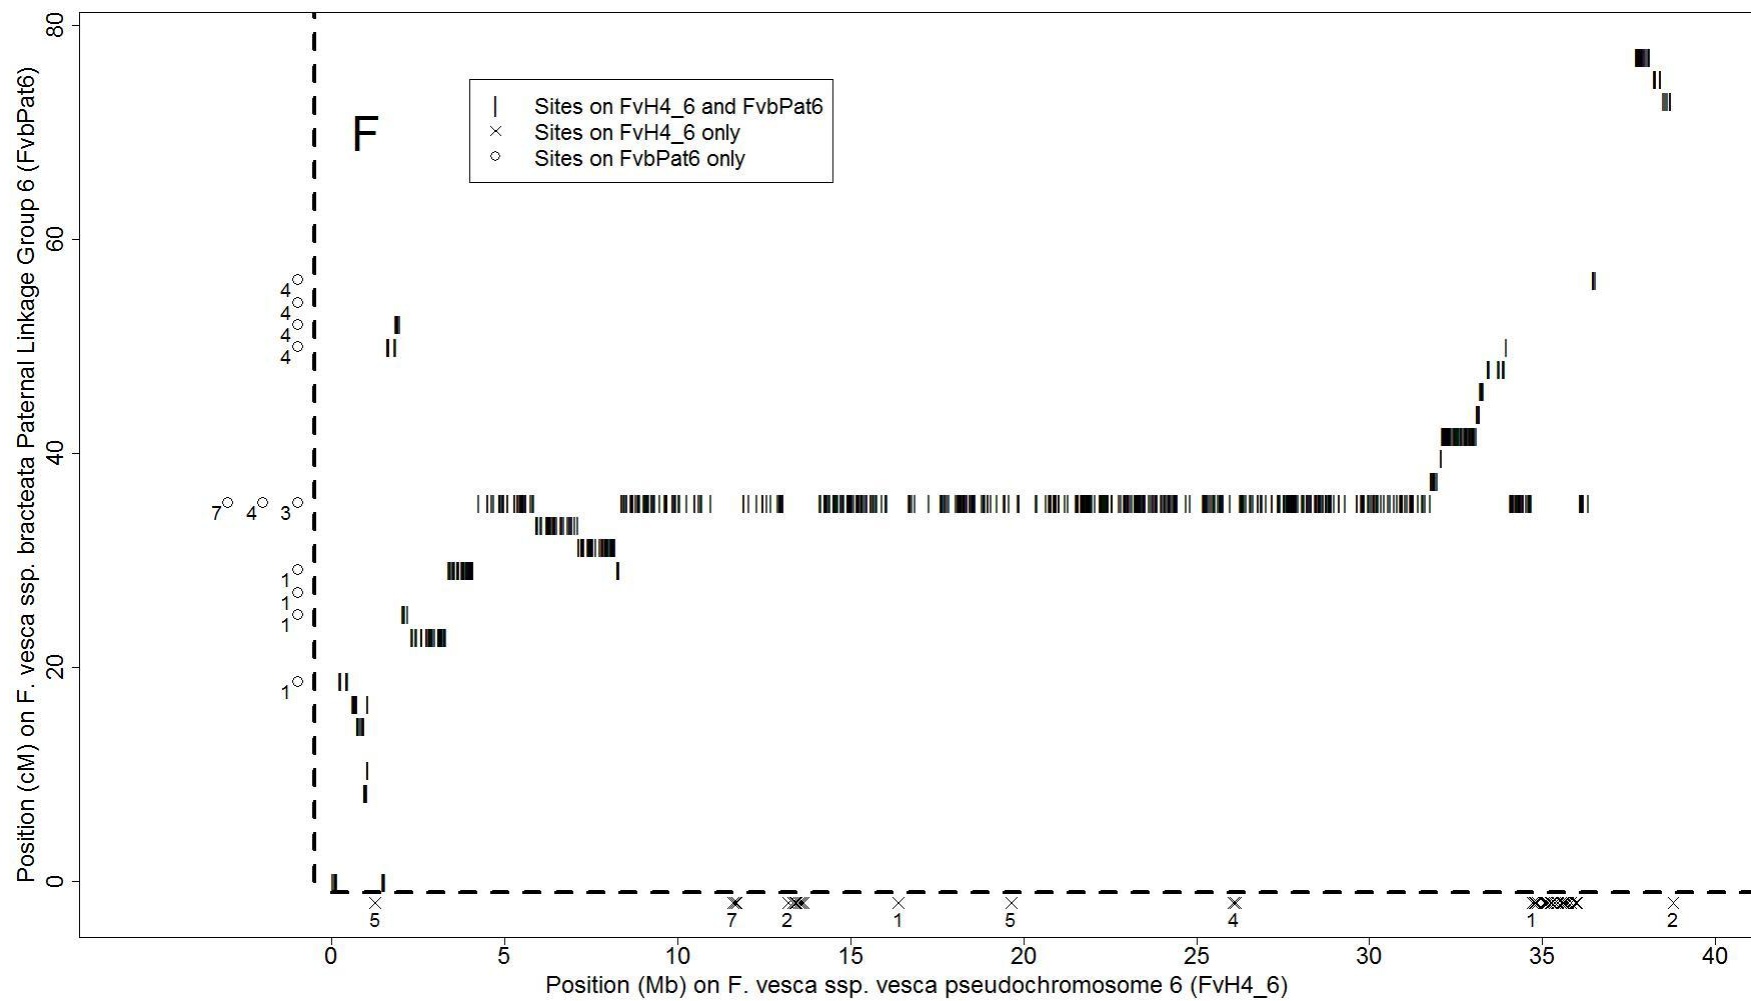



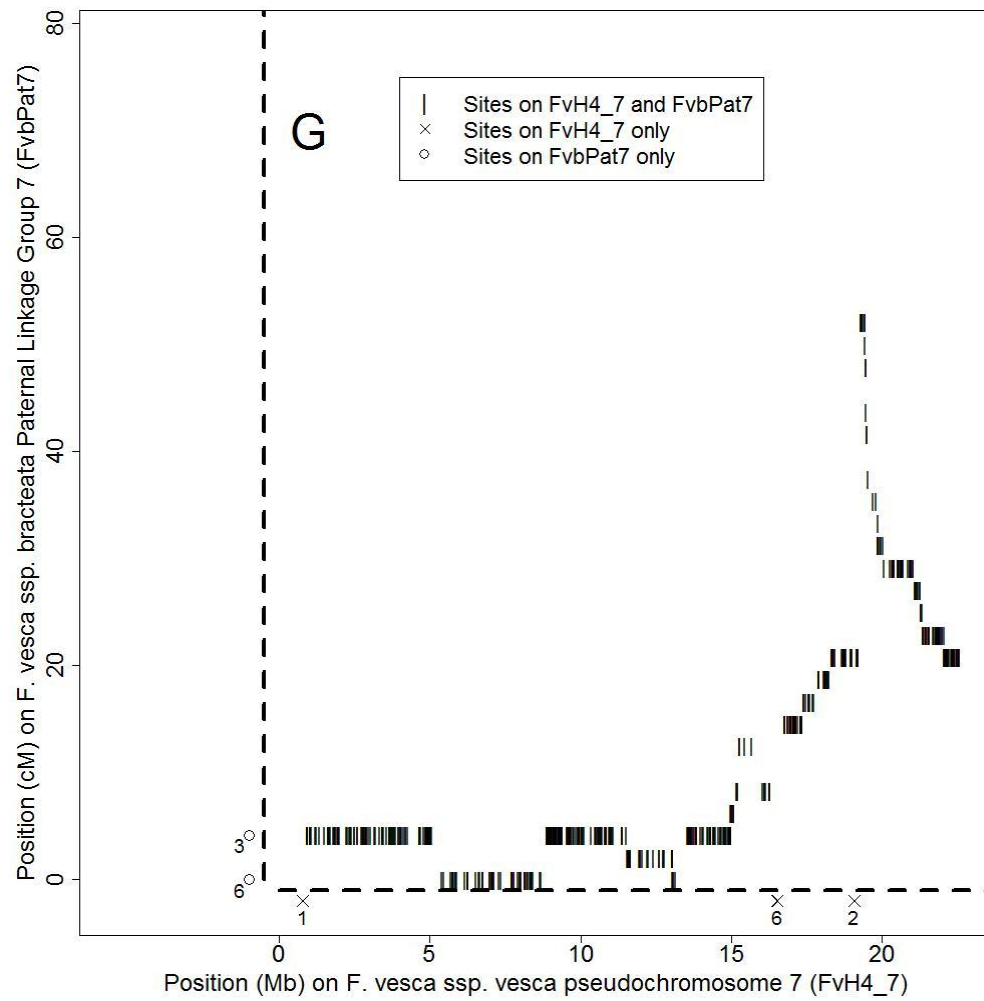

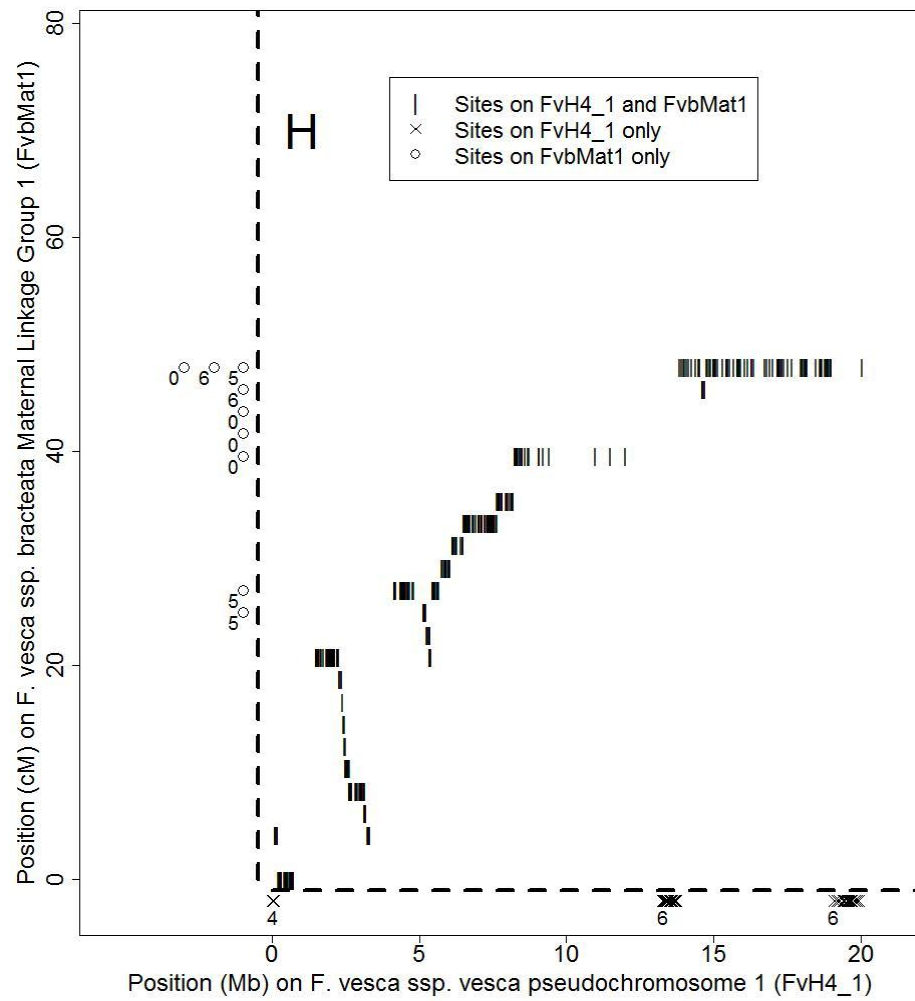

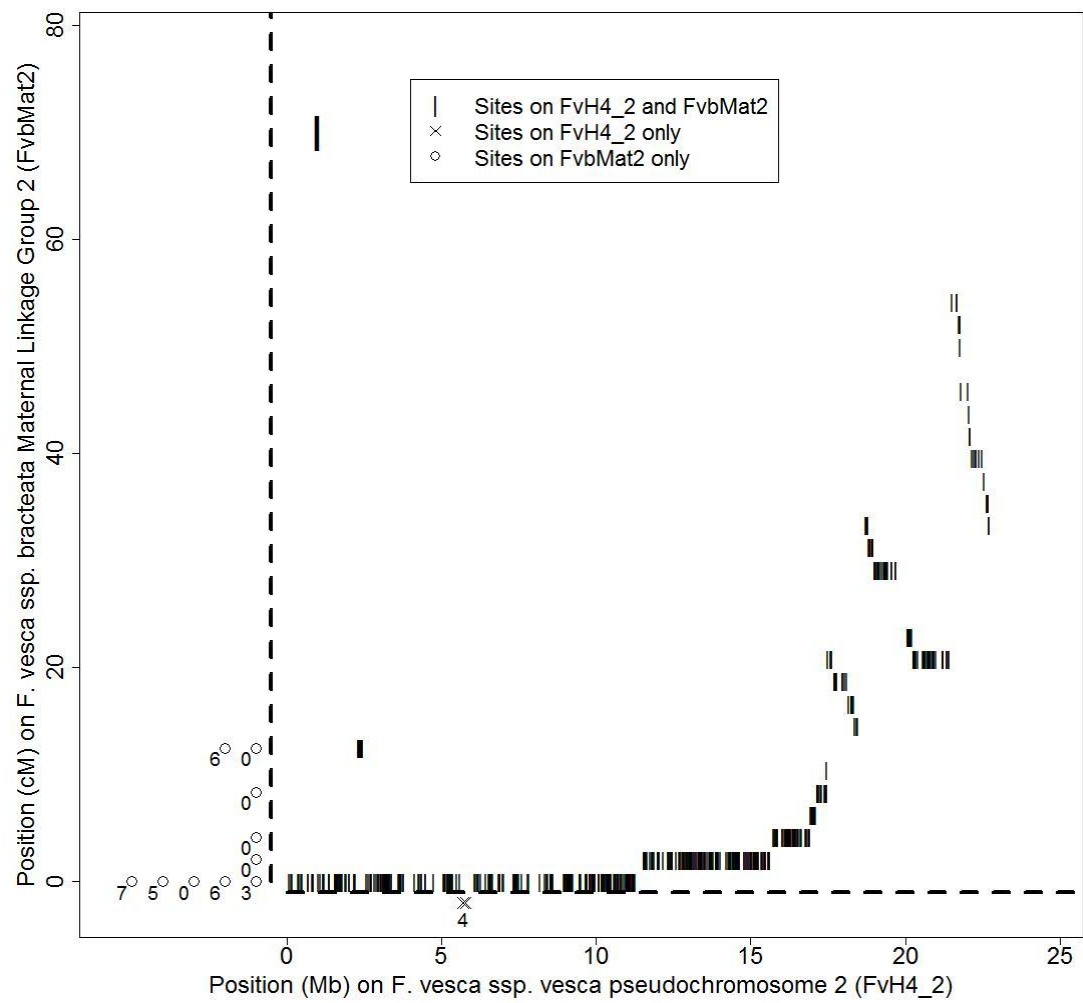

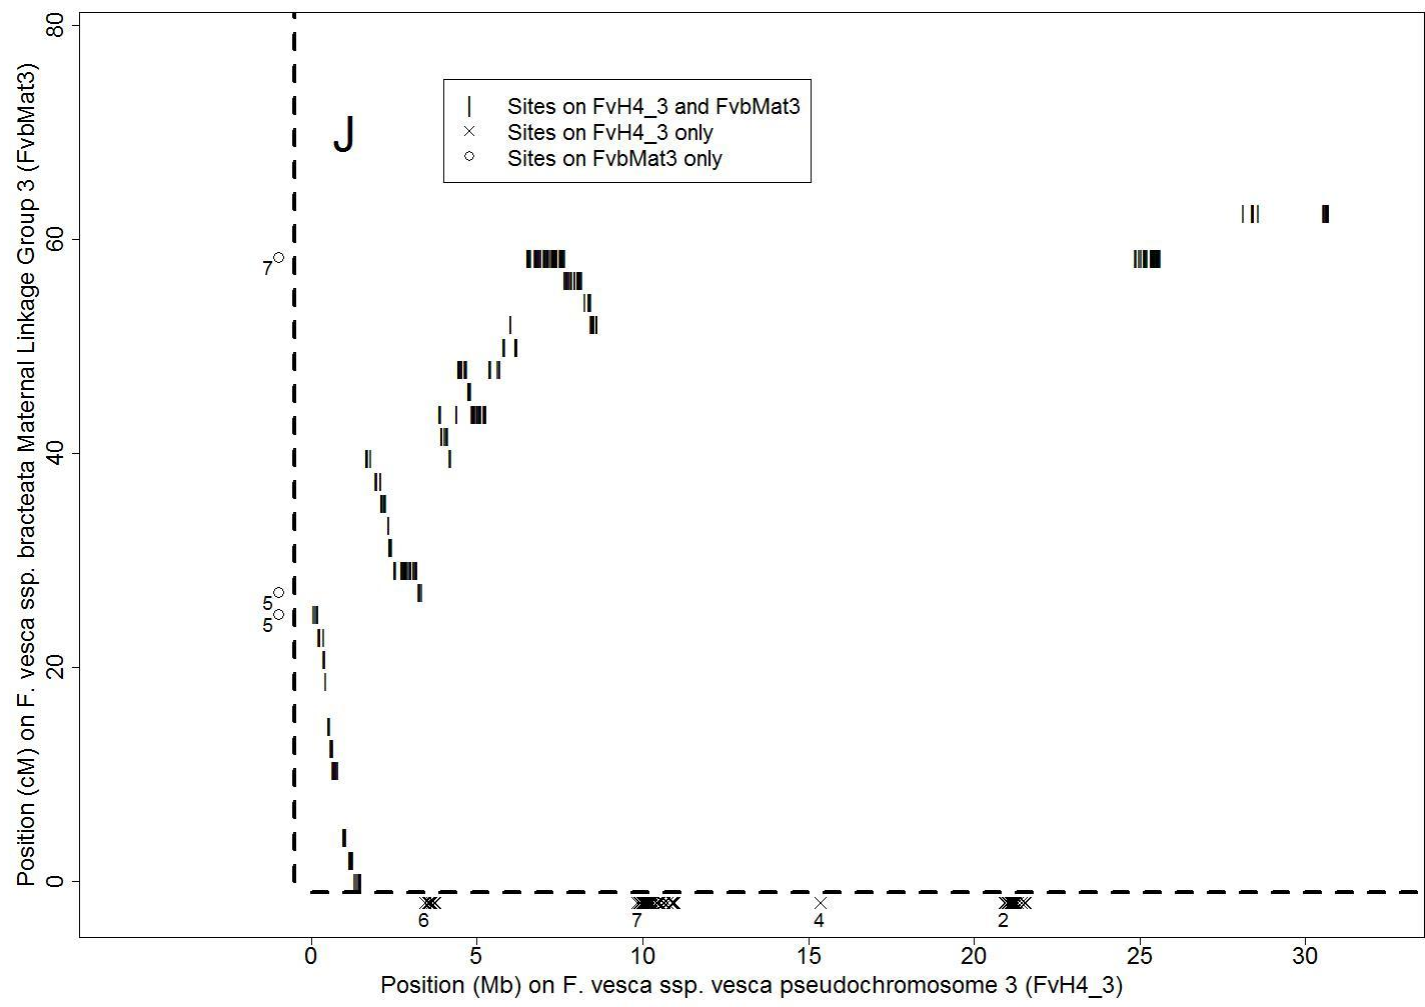



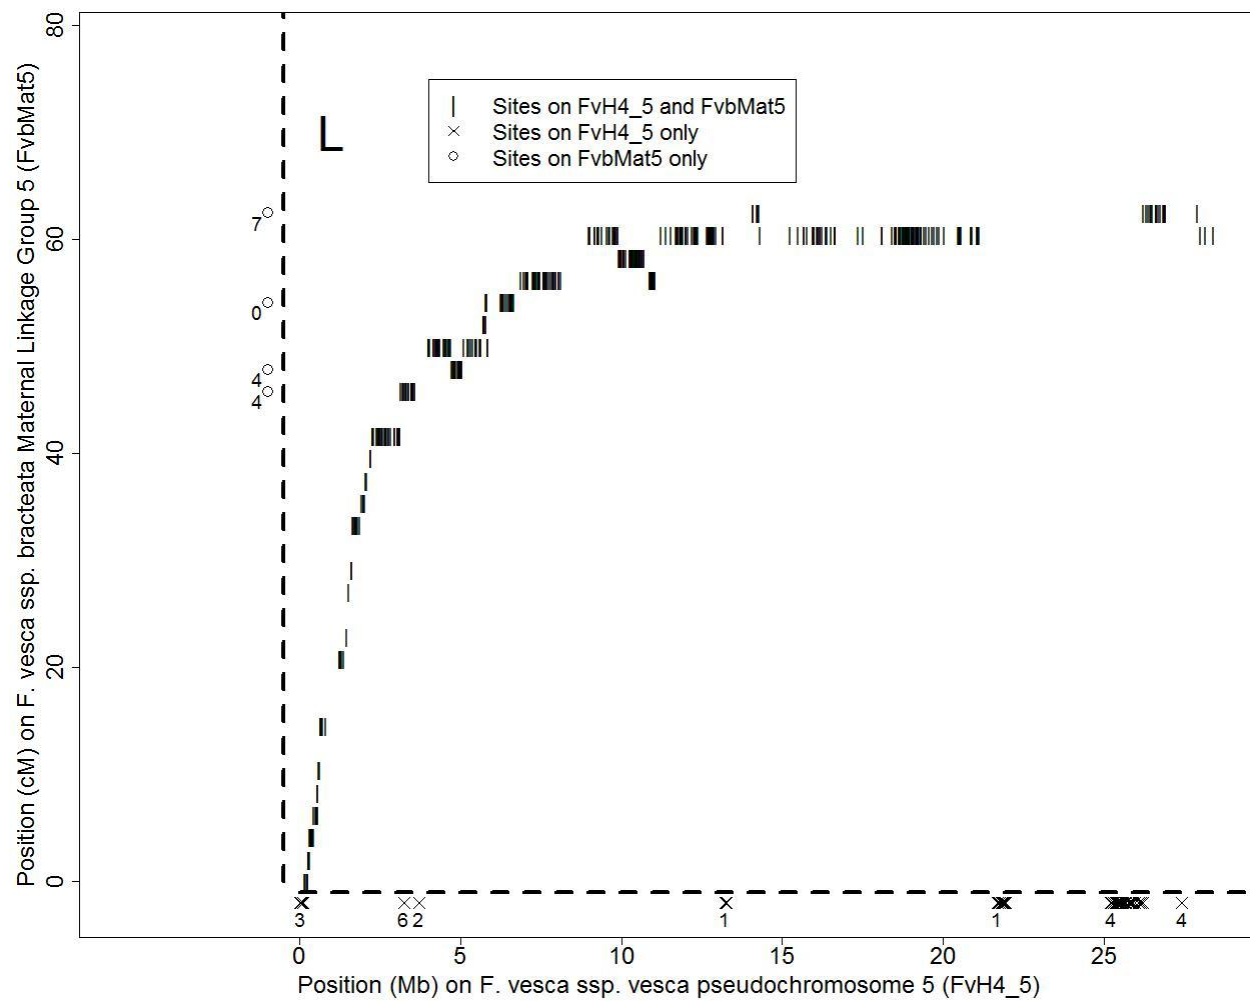

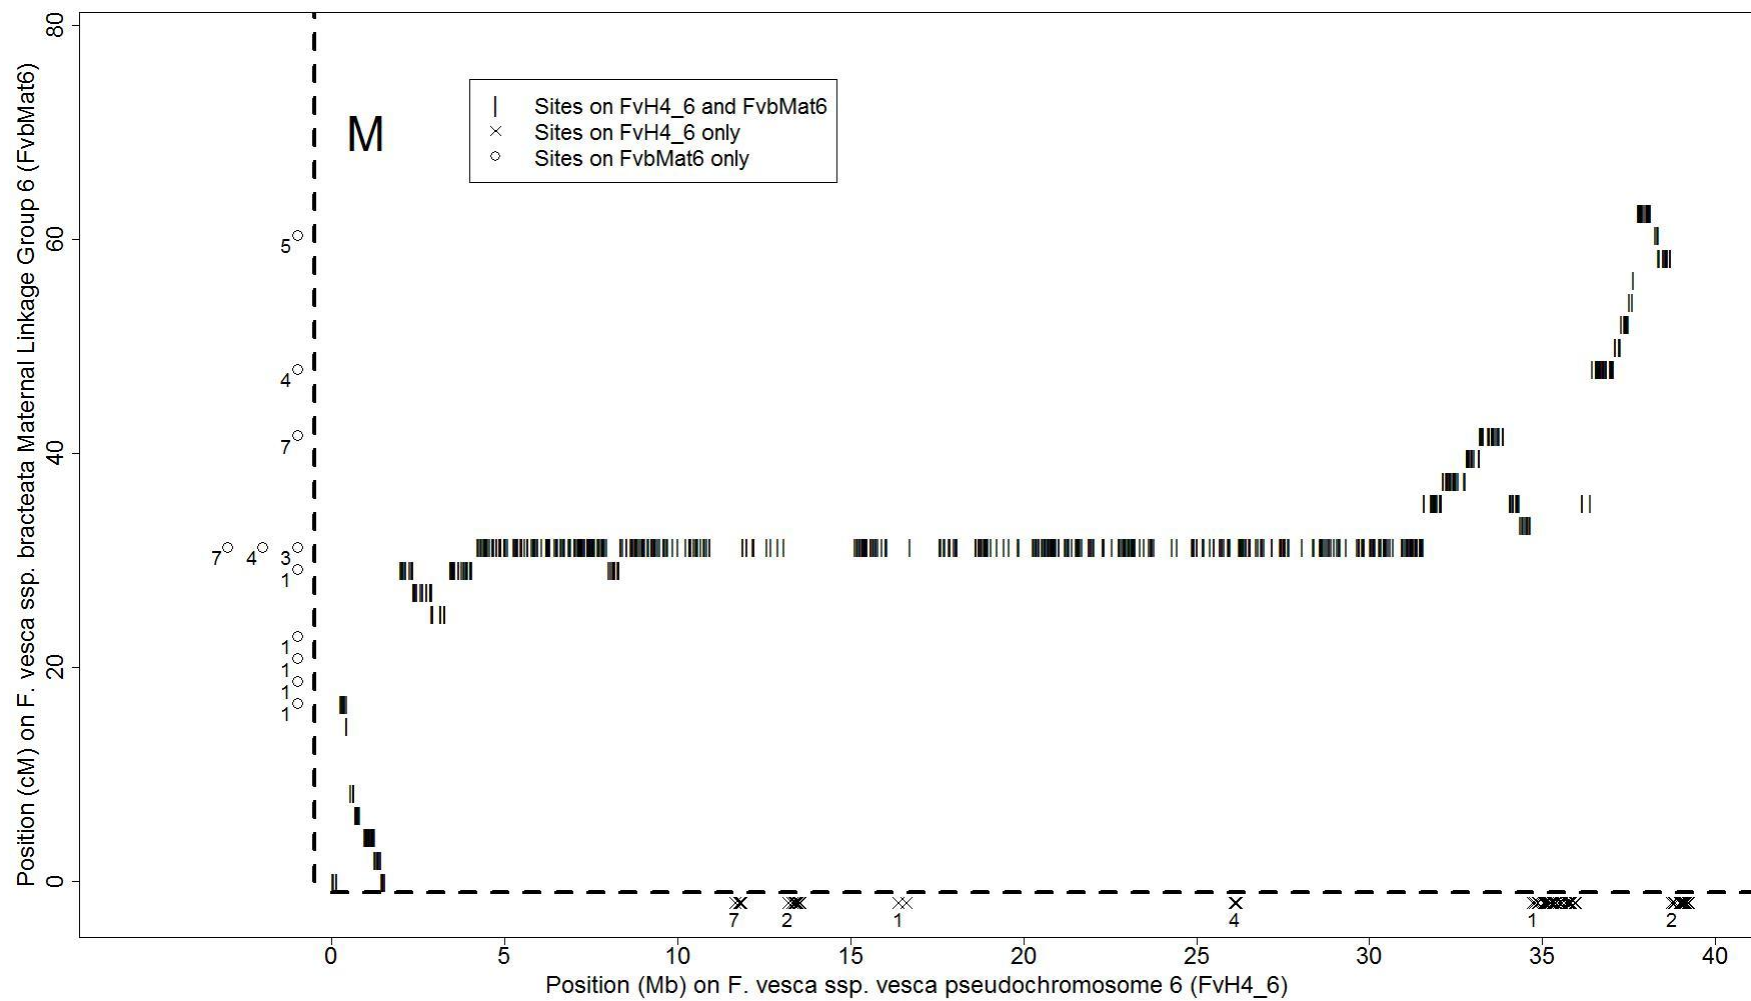

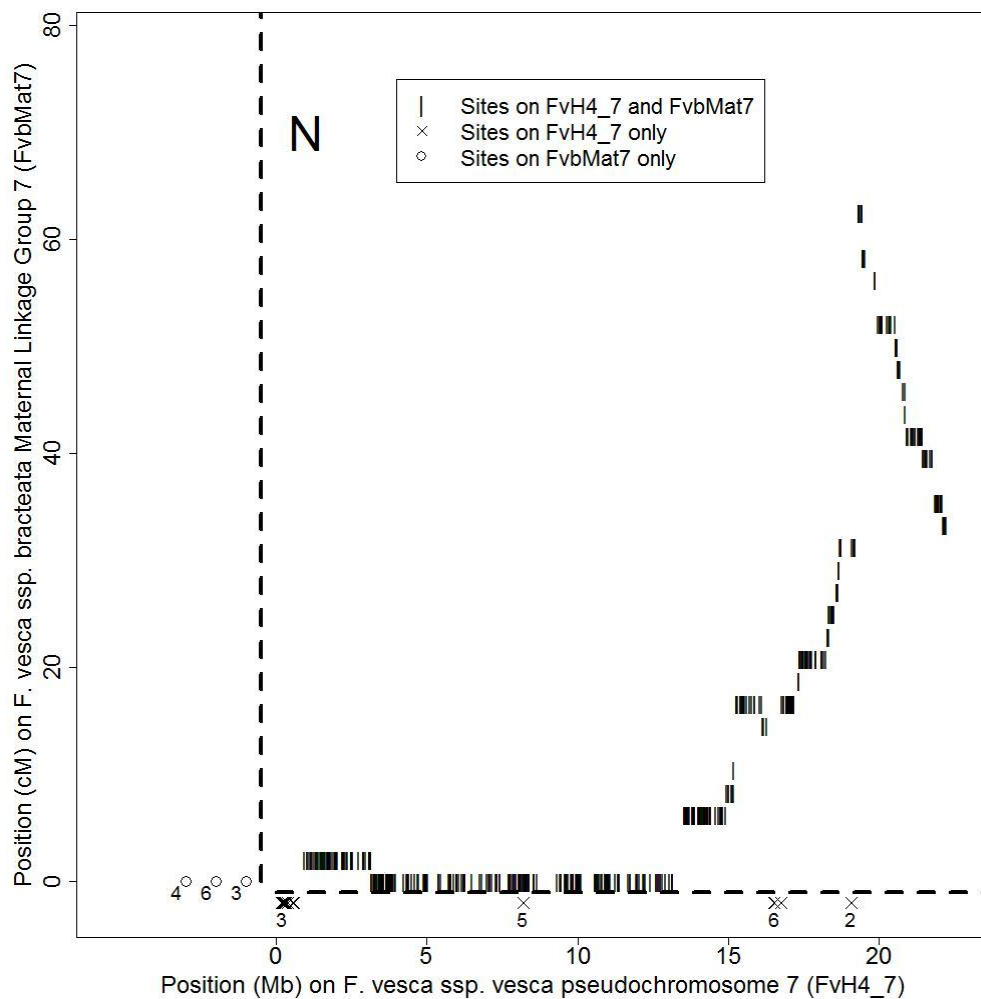

**Figure S2 (A-N)** Linkage groups in *F. vesca ssp. bracteata* plotted against the *F. vesca ssp. vesca* reference genome (FvH4). Each short vertical line represents an informative marker in our linkage map. Each linkage group is plotted against the FvH4 pseudo-chromosome with which it shares the most makers (the main pseudo-chromosome; Table 1). Markers that aligned somewhere in FvH4 other than the main pseudo-chromosome are indicated as circles on along left side of the figure, numbered according to FvH4 pseudo-chromosome. Markers that aligned to the main pseudo-chromosome but mapped to a different Fvb linkage group are indicated as x marks along the bottom of the figure, numbered according to Fvb linkage group. Markers that map to one part of the linkage group but align to a different part of the main pseudo-chromosome are within-chromosome translocations.



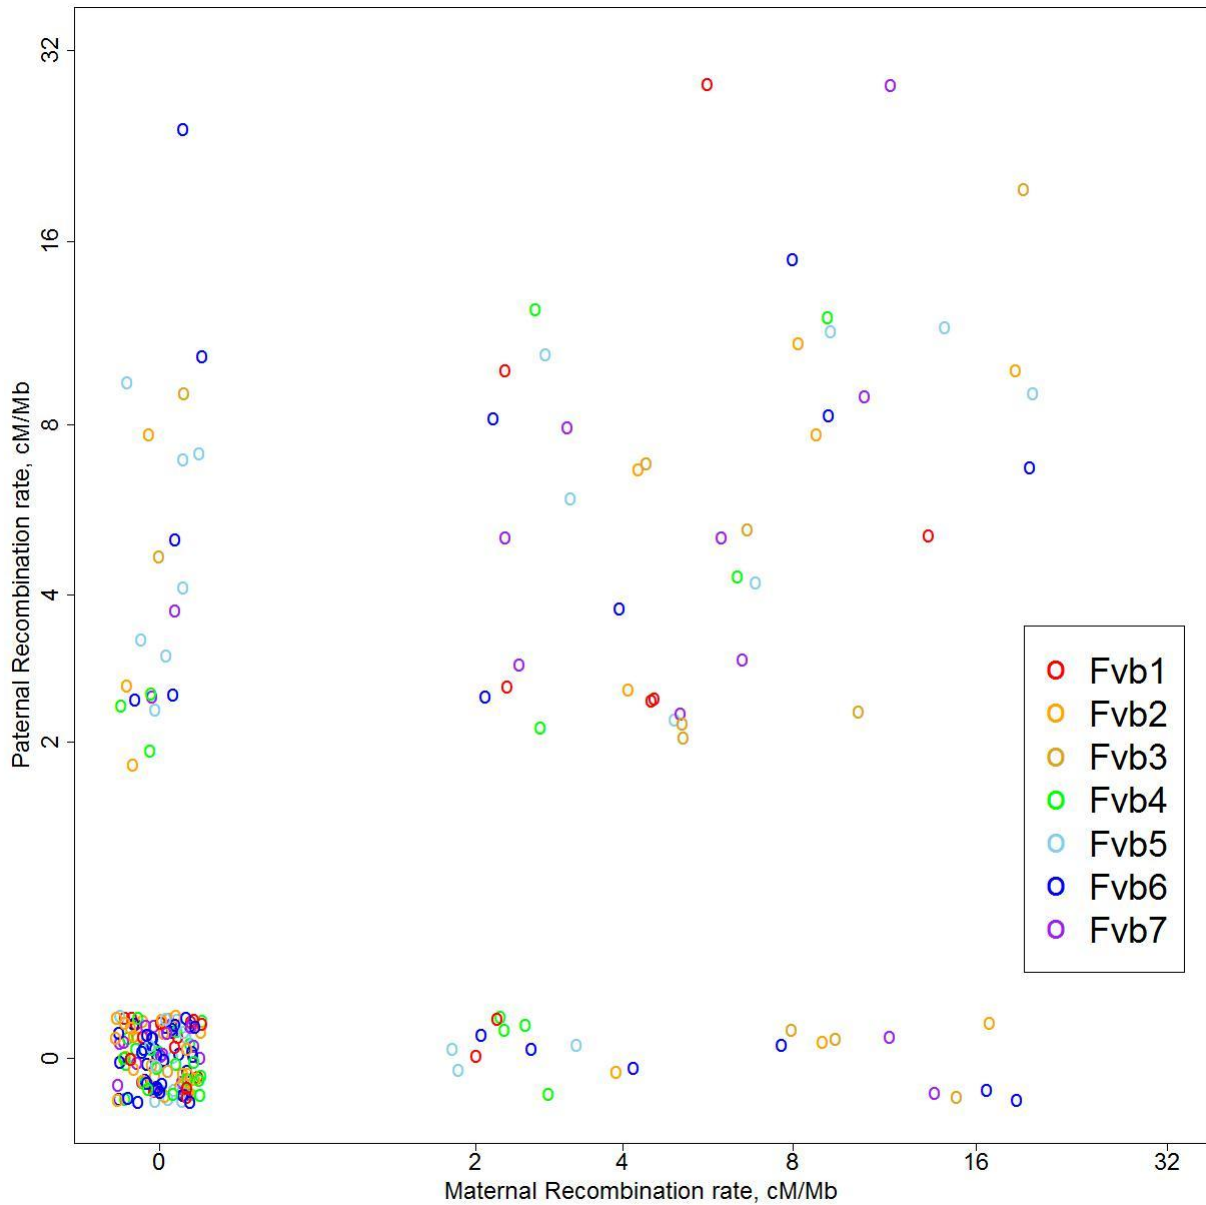

**Figure S3** Recombination rates are very similar in both parental maps. Each point represents a ~1Mb genomic region. Points are jittered (random noise added) for ease of visualization, rounded up so that all rates are nonzero, and plotted on a log scale. Recombination rates across the genome in both parents were highly correlated ( $r_s = 0.48$ ;  $P < 10^{-13}$ ). Most (60%) genomic regions showed no recombination in either parent, and those showing recombination often showed it in both parents.

**File S1**

**FASTA file of the 6575 targeted regions.**

Each region was targeted by three overlapping 100bp probes. Regions are named by chromosome and site position in FvH4.

File S1 is available for download at <http://www.g3journal.org/lookup/suppl/doi:10.1534/g3.113.006288/-/DC1>.

**File S2**

**Variant call format (vcf) file of all targeted capture genotypes used in linkage mapping.**

File S2 is available for download at <http://www.g3journal.org/lookup/suppl/doi:10.1534/g3.113.006288/-/DC1>.

**File S3**

**Map position (Fvb, in cM) and reference genome position (FvH4, in bp) for all markers.**

File S3 is available for download at <http://www.g3journal.org/lookup/suppl/doi:10.1534/g3.113.006288/-/DC1>.

**Table S1 Targeted capture Illumina sequencing data for two parents and 48 offspring.**

| Plant          | Targets <sup>a</sup> | Depth <sup>b</sup> | SNP_Depth <sup>c</sup> | Indel_Depth <sup>d</sup> | Gel_Pool <sup>e</sup> | Hyb_Pool <sup>f</sup> | Flowcell | Index  | Reads      | Sex           |
|----------------|----------------------|--------------------|------------------------|--------------------------|-----------------------|-----------------------|----------|--------|------------|---------------|
| MRD60 (father) | 6570                 | 224.31             | 224.59                 | 216.4                    | 4                     | B                     | fc1025   | CGATGT | 11,902,759 | hermaphrodite |
| MRD30 (mother) | 6568                 | 114.52             | 114.97                 | 101.56                   | 1                     | D                     | fc1025   | TGACCA | 3,053,617  | female        |
| MRD30x60.79    | 6570                 | 228.44             | 228.78                 | 218.64                   | none                  | A                     | fc1022   | CGATGT | 23,134,225 | hermaphrodite |
| MRD30x60.80    | 6571                 | 229.4              | 229.75                 | 219.18                   | none                  | A                     | fc1022   | TGACCA | 24,805,423 | hermaphrodite |
| MRD30x60.85    | 6571                 | 233.47             | 233.67                 | 227.81                   | none                  | A                     | fc1022   | ACAGTG | 28,143,687 | hermaphrodite |
| MRD30x60.87    | 6571                 | 235.05             | 235.13                 | 232.72                   | none                  | A                     | fc1022   | GCCAAT | 30,114,562 | hermaphrodite |
| MRD30x60.89    | 6572                 | 231.43             | 231.69                 | 223.97                   | none                  | A                     | fc1022   | CAGATC | 23,520,462 | unknown       |
| MRD30x60.90    | 6571                 | 231.78             | 232.03                 | 224.55                   | none                  | A                     | fc1022   | ATCACG | 25,682,095 | female        |
| MRD30x60.96    | 6572                 | 234.94             | 235.17                 | 228.48                   | none                  | A                     | fc1022   | CTTGTA | 31,354,180 | female        |
| MRD30x60.102   | 6571                 | 224.6              | 224.9                  | 215.86                   | none                  | A                     | fc1022   | TTAGGC | 19,257,936 | unknown       |
| MRD30x60.1     | 6567                 | 60.82              | 61.1                   | 52.8                     | 5                     | C                     | fc1025   | ACTTGA | 1,830,233  | hermaphrodite |
| MRD30x60.2     | 6567                 | 93.89              | 94.35                  | 80.5                     | 10                    | E                     | fc1025   | GATCAG | 3,037,486  | unknown       |
| MRD30x60.3     | 6570                 | 154.37             | 154.94                 | 137.76                   | 11                    | D                     | fc1025   | TAGCTT | 5,129,835  | hermaphrodite |
| MRD30x60.4     | 6564                 | 35.31              | 35.49                  | 30.21                    | 6                     | B                     | fc1025   | GGCTAC | 986,925    | female        |
| MRD30x60.6     | 6570                 | 135.11             | 135.63                 | 120.21                   | 11                    | D                     | fc1025   | AGTCAA | 4,247,282  | female        |
| MRD30x60.7     | 6571                 | 149.3              | 149.92                 | 131.68                   | 11                    | D                     | fc1025   | AGTTCC | 4,963,971  | female        |
| MRD30x60.14    | 6568                 | 114.1              | 114.59                 | 100.16                   | 11                    | D                     | fc1025   | ATGTCA | 3,423,053  | unknown       |
| MRD30x60.15    | 6559                 | 41.04              | 41.19                  | 36.81                    | 9                     | C                     | fc1025   | CCGTCC | 1,219,685  | hermaphrodite |
| MRD30x60.16    | 6571                 | 131.83             | 132.44                 | 114.24                   | 12                    | E                     | fc1025   | GTAGAG | 3,673,595  | female        |
| MRD30x60.17    | 6571                 | 116.42             | 117                    | 99.93                    | 8                     | E                     | fc1025   | GTCCGC | 3,262,604  | female        |
| MRD30x60.28    | 6570                 | 120.47             | 120.99                 | 105.65                   | 10                    | E                     | fc1025   | GTGAAA | 3,780,144  | hermaphrodite |
| MRD30x60.29    | 6568                 | 76.03              | 76.45                  | 63.89                    | 8                     | E                     | fc1025   | GTGGCC | 2,118,379  | hermaphrodite |
| MRD30x60.34    | 6571                 | 123.23             | 123.8                  | 106.76                   | 12                    | E                     | fc1025   | GTTTCG | 3,427,160  | hermaphrodite |
| MRD30x60.37    | 6570                 | 100.65             | 101.15                 | 86.35                    | 12                    | E                     | fc1025   | CGTACG | 2,804,322  | hermaphrodite |
| MRD30x60.38    | 6568                 | 76.23              | 76.57                  | 66.46                    | 12                    | E                     | fc1025   | GAGTGG | 2,108,575  | female        |
| MRD30x60.40    | 6571                 | 133.51             | 134.1                  | 116.66                   | 6                     | B                     | fc1025   | GGTAGC | 3,858,155  | female        |
| MRD30x60.44    | 6569                 | 147.61             | 148.19                 | 131.02                   | 6                     | B                     | fc1025   | ACTGAT | 4,310,075  | hermaphrodite |
| MRD30x60.45    | 6562                 | 49.09              | 49.3                   | 42.99                    | 9                     | C                     | fc1025   | ATGAGC | 1,512,152  | unknown       |
| MRD30x60.47    | 6561                 | 36.4               | 36.57                  | 31.6                     | 4                     | B                     | fc1025   | ATTCTT | 1,002,318  | female        |
| MRD30x60.49    | 6568                 | 72.02              | 72.28                  | 64.67                    | 4                     | B                     | fc1025   | CAAAAG | 1,999,772  | female        |
| MRD30x60.51    | 6569                 | 68.09              | 68.36                  | 60.16                    | 4                     | B                     | fc1025   | CAACTA | 1,891,836  | hermaphrodite |
| MRD30x60.52    | 6568                 | 99.68              | 100.1                  | 87.57                    | 5                     | C                     | fc1025   | CACCGG | 3,093,930  | hermaphrodite |
| MRD30x60.55    | 6561                 | 51.81              | 52.1                   | 43.16                    | 8                     | E                     | fc1025   | CACGAT | 1,372,967  | female        |

|              |      |        |        |        |    |   |        |        |           |               |
|--------------|------|--------|--------|--------|----|---|--------|--------|-----------|---------------|
| MRD30x60.57  | 6564 | 48.25  | 48.49  | 41.36  | 3  | D | fc1025 | CACTCA | 1,269,038 | unknown       |
| MRD30x60.58  | 6569 | 89.26  | 89.57  | 80.25  | 7  | C | fc1025 | CAGGCG | 2,871,991 | female        |
| MRD30x60.67  | 6569 | 90.48  | 90.83  | 80.21  | 2  | B | fc1025 | CATGGC | 2,469,957 | female        |
| MRD30x60.68  | 6571 | 185.9  | 186.43 | 170.51 | 10 | E | fc1025 | CATTTT | 6,282,413 | hermaphrodite |
| MRD30x60.70  | 6567 | 92.63  | 92.99  | 82.13  | 2  | B | fc1025 | CCAACA | 2,638,079 | unknown       |
| MRD30x60.71  | 6563 | 35.92  | 36.11  | 30.51  | 3  | D | fc1025 | CGGAAT | 952,421   | hermaphrodite |
| MRD30x60.72  | 6566 | 68.03  | 68.38  | 57.95  | 7  | C | fc1025 | CTAGCT | 2,034,633 | hermaphrodite |
| MRD30x60.73  | 6564 | 82.72  | 83.09  | 72.3   | 5  | C | fc1025 | CTATAC | 2,413,967 | hermaphrodite |
| MRD30x60.74  | 6569 | 104.19 | 104.58 | 92.91  | 7  | C | fc1025 | CTCAGA | 3,264,413 | unknown       |
| MRD30x60.78  | 6568 | 84.43  | 84.8   | 73.94  | 9  | C | fc1025 | GCGCTA | 2,750,451 | female        |
| MRD30x60.82  | 6570 | 144.84 | 145.37 | 129.35 | 6  | B | fc1025 | TAATCG | 4,372,706 | hermaphrodite |
| MRD30x60.84  | 6572 | 184.49 | 184.98 | 170.29 | 7  | C | fc1025 | TACAGC | 7,423,846 | female        |
| MRD30x60.88  | 6569 | 87.92  | 88.27  | 77.93  | 5  | C | fc1025 | TATAAT | 2,452,805 | female        |
| MRD30x60.92  | 6567 | 78.32  | 78.65  | 68.91  | 1  | D | fc1025 | TCATTC | 2,022,507 | hermaphrodite |
| MRD30x60.94  | 6568 | 72.72  | 73.07  | 62.55  | 1  | D | fc1025 | TCCCGA | 1,924,070 | female        |
| MRD30x60.95  | 6565 | 111.83 | 112.25 | 99.76  | 2  | B | fc1025 | TCGAAG | 3,102,468 | hermaphrodite |
| MRD30x60.100 | 6565 | 60.37  | 60.65  | 52.06  | 10 | E | fc1025 | TCGGCA | 1,877,322 | hermaphrodite |

<sup>a</sup>Number of targeted polymorphisms with nonzero depth.

<sup>b</sup>Mean depth (coverage) among all targeted polymorphisms (SNPs and indels).

<sup>c</sup>Mean depth (coverage) among all targeted SNPs.

<sup>d</sup>Mean depth (coverage) among all targeted indels.

<sup>e</sup>Prior to gel extraction, libraries were pooled in groups of 4, as indicated.

<sup>f</sup>A total of 8 or 12 libraries were pooled for a single hybridization reaction, as indicated.

**Table S2 Primer sequences and scaffold coordinates for nine informative polymorphic sites.** These were identified from the low-coverage genome sequences of the parents on scaffold scB (scf0513158 positions 2,258,778-4,674,928). The phenotyped targeted capture offspring (N=40) and additional offspring from the cross (N=55) with known sexual phenotypes were genotyped at these informative sites by Sanger sequencing (Figure 5).

| Locus       | Scaffold coordinates <sup>a</sup> | Forward/ Reverse primer sequences (5' - 3') | Annealing temperature °C - Time |
|-------------|-----------------------------------|---------------------------------------------|---------------------------------|
| scB_1556471 | 1556327-1556351                   | For: GTGAATTACATGAAGGTGACTGGGG              | 54°C - 30 sec                   |
|             | 1556795-1556819                   | Rev: AAAAGGGGTCATCACATCTGGAAAC              |                                 |
| scB_1644279 | 1643952-1643977                   | For: ACTACCAACTAGAGACACACATTCCC             | 56°C - 30 sec                   |
|             | 1644581-1644605                   | Rev: GAGAAATGATCCAAGACAGAGAGGC              |                                 |
| scB_1675672 | 1675540-1675564                   | For: TATGAAGTGGCGTAGAGAATAGGGC              | 56°C - 30 sec                   |
|             | 1675835-1675859                   | Rev: TTAGCAACAACAAAACCTGGACTC               |                                 |
| scB_1689672 | 1689392-1689416                   | For: TACGAGTTGCCTTTTGGAGGTTAGG              | 56°C - 30 sec                   |
|             | 1689726-1689750                   | Rev: TCAATTAGTCTTGGCCTTGCTTCTG              |                                 |
| scB_1711631 | 1711443-1711467                   | For: CTACAGACCAACACCGTCAAATAC               | 56°C - 30 sec                   |
|             | 1711904-1711928                   | Rev: CTTCTTCTGACCTCTCTGACTTTGC              |                                 |
| scB_1731089 | 1730768-1730793                   | For: GCCCTGTTGTAGAAATGAATCTGGAG             | 56°C - 30 sec                   |
|             | 1731360-1731383                   | Rev: TTATTCCCCTACTCACACTCAGC                |                                 |
| scB_1776904 | 1776703-1776727                   | For: TTTCATTCTCCGACTAAAGCTGC                | 56°C - 30 sec                   |
|             | 1777051-1777076                   | Rev: CCACTCACTTTTAACCAGATGCTCAG             |                                 |
| scB_1804106 | 1803856-1803886                   | For: ATGGTAGCATAATGCCTCATATAACACTAG         | 56°C - 30 sec                   |
|             | 1804266-1804293                   | Rev: GTGAGGTTCTTGCCATCTTTATTCCAC            |                                 |
| scB_2027728 | 2027451-2027475                   | For: CAGTTTGTGTATGTGTTTGTGCGG               | 56°C - 30 sec                   |
|             | 2028097-2028121                   | Rev: GCATTTAGATTTCCAAGCGTTAGCC              |                                 |

<sup>a</sup>Coordinates are with respect to scB (add 2,258,777 to determine the position on scaffold scf0513158 in the *F. vesca* ssp. *vesca* reference genome version 1. 0).

**Table S3 Incongruities between FvH4 and Fvb.** Listed are scaffolds from FvH4 that map to Fvb linkage groups in ways incompatible with their assembly position in FvH4. Some of these likely represent assembly errors, while others likely represent real translocations or inversions.

| Scaffold     | Pseudochromosome | Start    | End      | Linkage_Group | Entire scaffold? <sup>a</sup> | Type                                                             |
|--------------|------------------|----------|----------|---------------|-------------------------------|------------------------------------------------------------------|
| scf0512942   | FvH4_0           | 317810   | 486710   | 4             | yes                           | assignment of unanchored scaffold                                |
| scf0512960   | FvH4_0           | 771617   | 922450   | 5             | yes                           | assignment of unanchored scaffold                                |
| scf0512975   | FvH4_0           | 932451   | 1031722  | 4             | yes                           | assignment of unanchored scaffold                                |
| scf0513018   | FvH4_0           | 1199431  | 1488070  | 2             | yes                           | assignment of unanchored scaffold                                |
| scf0513028   | FvH4_0           | 1498071  | 1647224  | 4             | yes                           | assignment of unanchored scaffold                                |
| scf0513041   | FvH4_0           | 2252495  | 2721037  | 1             | yes                           | assignment of unanchored scaffold                                |
| scf0513045   | FvH4_0           | 2731038  | 2792572  | 5             | yes                           | assignment of unanchored scaffold                                |
| scf0513068   | FvH4_0           | 2802573  | 3345236  | 2             | yes                           | assignment of unanchored scaffold                                |
| scf0513081   | FvH4_0           | 4365948  | 5638289  | 1             | yes                           | assignment of unanchored scaffold                                |
| scf0513119   | FvH4_0           | 5648290  | 6841401  | 2             | yes                           | assignment of unanchored scaffold                                |
| scf0513137   | FvH4_0           | 7326933  | 8406320  | 2             | yes                           | assignment of unanchored scaffold                                |
| scf0513148   | FvH4_0           | 9021620  | 9922368  | 2             | yes                           | assignment of unanchored scaffold                                |
| scf0513155   | FvH4_0           | 9932369  | 11179145 | 4             | yes                           | assignment of unanchored scaffold                                |
| scf0513189   | FvH4_0           | 11189146 | 11767950 | 1,2           | no                            | assignment of unanchored scaffold, interchromosome translocation |
| scf0513151   | FvH4_1           | 1        | 1445376  | 4,1           | no                            | interchromosome translocation, inversion                         |
| scf0513105   | FvH4_1           | 1455377  | 3331343  | 1             | yes                           | inversion                                                        |
| scf0513114   | FvH4_1           | 3341344  | 4120631  | 5             | yes                           | interchromosome translocation                                    |
| scf0512959   | FvH4_1           | 4829947  | 5419653  | 1,5           | no                            | inversion, interchromosome translocation                         |
| scf0513095   | FvH4_1           | 13186592 | 14572914 | 6             | no                            | interchromosome translocation                                    |
| scf0513168_1 | FvH4_1           | 17339065 | 19938125 | 3,6           | no                            | interchromosome translocation (x2)                               |
| scf0512938   | FvH4_2           | 2272727  | 2456317  | 2             | yes                           | intrachromosome translocation                                    |
| scf0513057   | FvH4_2           | 5704770  | 6000074  | 4             | yes                           | interchromosome translocation                                    |
| scf0512968   | FvH4_2           | 17482696 | 18535496 | 2             | yes                           | inversion                                                        |
| scf0513134   | FvH4_2           | 18667366 | 21445916 | 2             | yes                           | inversion                                                        |
| scf0513194   | FvH4_2           | 21455917 | 24538926 | 2             | yes                           | inversion                                                        |
| scf0513171   | FvH4_3           | 1        | 1497153  | 3             | yes                           | inversion                                                        |
| scf0513104   | FvH4_3           | 1507154  | 3362024  | 3             | yes                           | inversion                                                        |
| scf0513072   | FvH4_3           | 3372025  | 3727613  | 6             | yes                           | interchromosome translocation                                    |
| scf0513017   | FvH4_3           | 3737614  | 4232872  | 3             | yes                           | inversion                                                        |
| scf0513082   | FvH4_3           | 4410664  | 5334373  | 3             | yes                           | inversion                                                        |
| scf0513173   | FvH4_3           | 6456995  | 8718722  | 3             | yes                           | inversion                                                        |
| scf0513089   | FvH4_3           | 9045060  | 9383133  | 7             | yes                           | interchromosome translocation                                    |



|                         |        |          |          |     |     |                                          |
|-------------------------|--------|----------|----------|-----|-----|------------------------------------------|
| scf0513156              | FvH4_3 | 9809969  | 11035985 | 7   | yes | interchromosome translocation            |
| scf0513115              | FvH4_3 | 11045986 | 11903823 | 5   | yes | interchromosome translocation            |
| scf0513053              | FvH4_3 | 15204652 | 15608968 | 4   | yes | interchromosome translocation            |
| scf0513125              | FvH4_3 | 19509464 | 21597487 | 2   | yes | interchromosome translocation            |
| scf0513015              | FvH4_3 | 27880400 | 28601208 | 3   | yes | intrachromosome translocation            |
| scf0513029              | FvH4_3 | 30982798 | 31368128 | 3   | yes | inversion                                |
| scf0513065              | FvH4_4 | 1        | 206650   | 6   | yes | interchromosome translocation            |
| scf0513090              | FvH4_4 | 7833870  | 8595096  | 3   | yes | interchromosome translocation            |
| scf0513124_4            | FvH4_4 | 9525261  | 10260387 | 6   | no  | interchromosome translocation            |
| scf0513150              | FvH4_4 | 12599598 | 14043386 | 5   | no  | interchromosome translocation            |
| scf0512935              | FvH4_4 | 14053387 | 15031722 | 4   | yes | intrachromosome translocation            |
| scf0513004              | FvH4_4 | 22938187 | 23936647 | 6   | no  | interchromosome translocation            |
| scf0513025              | FvH4_4 | 23946648 | 24163290 | 4   | yes | inversion                                |
| scf0513158_4            | FvH4_4 | 24298703 | 26557413 | 7   | no  | interchromosome translocation            |
| scf0513012              | FvH4_5 | 1        | 128260   | 3   | yes | interchromosome translocation            |
| scf0513098              | FvH4_5 | 138261   | 3585757  | 6   | no  | interchromosome translocation            |
| scf0513052              | FvH4_5 | 3595758  | 3984026  | 2   | yes | interchromosome translocation            |
| scf0511962              | FvH4_5 | 5833229  | 5933781  | 5   | yes | intrachromosome translocation            |
| scf0513135              | FvH4_5 | 8572001  | 11121459 | 5   | yes | inversion                                |
| scf0513066              | FvH4_5 | 13220304 | 13294433 | 1   | yes | interchromosome translocation            |
| scf0513166              | FvH4_5 | 14797581 | 15196668 | 5   | yes | intrachromosome translocation            |
| scf0513094              | FvH4_5 | 17913724 | 20360920 | 5   | yes | inversion                                |
| scf0513146_5            | FvH4_5 | 20370921 | 21946032 | 1   | no  | interchromosome translocation            |
| scf0513187              | FvH4_5 | 23614770 | 26212222 | 4   | no  | interchromosome translocation            |
| scf0512965              | FvH4_5 | 26222223 | 26854803 | 5   | yes | intrachromosome translocation            |
| scf0513087              | FvH4_5 | 27369861 | 27940252 | 4   | no  | interchromosome translocation            |
| scf0512963 <sup>b</sup> | FvH4_5 | 27950253 | 28286745 | 5   | yes | intrachromosome translocation            |
| scf0513011 <sup>b</sup> | FvH4_5 | 28296746 | 28438568 | 5   | yes | intrachromosome translocation            |
| scf0513168_6            | FvH4_6 | 213555   | 1544462  | 5,6 | no  | interchromosome translocation, inversion |
| scf0512983              | FvH4_6 | 1554463  | 1973909  | 6   | yes | intrachromosome translocation            |
| scf0513061              | FvH4_6 | 1983910  | 3376700  | 6   | yes | inversion                                |
| scf0513177              | FvH4_6 | 4210475  | 8315614  | 6   | yes | inversion                                |
| scf0513185              | FvH4_6 | 11066533 | 11863480 | 7   | yes | interchromosome translocation            |
| scf0513196              | FvH4_6 | 13162357 | 15497570 | 2   | no  | interchromosome translocation            |
| scf0513176              | FvH4_6 | 16117078 | 18575326 | 1   | no  | interchromosome translocation            |
| scf0512952              | FvH4_6 | 19487000 | 19734822 | 5   | no  | interchromosome translocation            |

|                         |        |          |          |       |     |                                                                      |
|-------------------------|--------|----------|----------|-------|-----|----------------------------------------------------------------------|
| scf0513040              | FvH4_6 | 25990763 | 26193578 | 4     | yes | interchromosome translocation                                        |
| scf0512991              | FvH4_6 | 34044179 | 36036831 | 1, 6  | no  | interchromosome translocation,<br>intrachromosome translocation      |
| scf0512961              | FvH4_6 | 36046832 | 36389855 | 6     | yes | intrachromosome translocation                                        |
| scf0513112              | FvH4_6 | 38173164 | 39347594 | 2,6   | no  | interchromosome translocation, inversion                             |
| scf0513170              | FvH4_7 | 1        | 5155874  | 1,3,7 | no  | interchromosome translocation (x2),<br>intrachromosome translocation |
| scf0513080              | FvH4_7 | 7699732  | 8246547  | 5     | no  | interchromosome translocation                                        |
| scf0512990 <sup>c</sup> | FvH4_7 | 11408502 | 12404147 | 7     | no  | inversion                                                            |
| scf0512946 <sup>c</sup> | FvH4_7 | 12414148 | 13183493 | 7     | no  | inversion                                                            |
| scf0513113 <sup>d</sup> | FvH4_7 | 15242379 | 16658559 | 6,7   | no  | interchromosome translocation, inversion                             |
| scf0513044 <sup>d</sup> | FvH4_7 | 16668560 | 19276478 | 2,6   | no  | interchromosome translocation (x2)                                   |
| scf0513190              | FvH4_7 | 19286479 | 22556666 | 7     | yes | inversion                                                            |

<sup>a</sup>Indicates whether data are compatible with the entire scaffold, and only the entire scaffold, contributing to the incongruity. Such scaffolds may represent assembly errors.

<sup>b</sup>same translocation from FvH4\_5 to a different part of Fvb5

<sup>c</sup> same inversion on FvH4\_7

<sup>d</sup>same translocation from FvH4\_7 to Fvb6
