# Supplementary material for: Targeted Sequence Capture Provides Insight into Genome Structure and Genetics of Male Sterility in a Gynodioecious Diploid Strawberry, Fragaria vesca ssp. bracteata (Rosaceae)
Source: PubMed Central journal article supplement (PMC3737174; doi:10.1534/g3.113.006288), 2013-08-01
Supplement: supp_g3.113.006288_FigureS2.pdf [file supp_g3.113.006288_FigureS2.pdf]

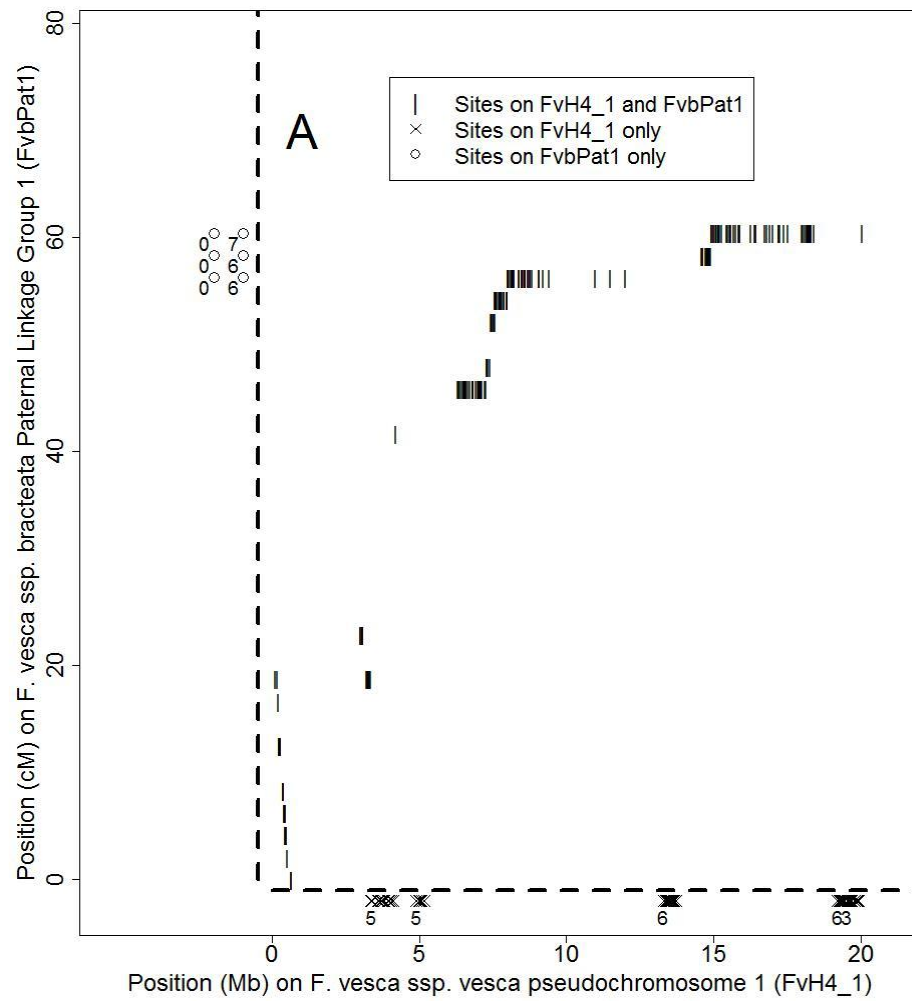

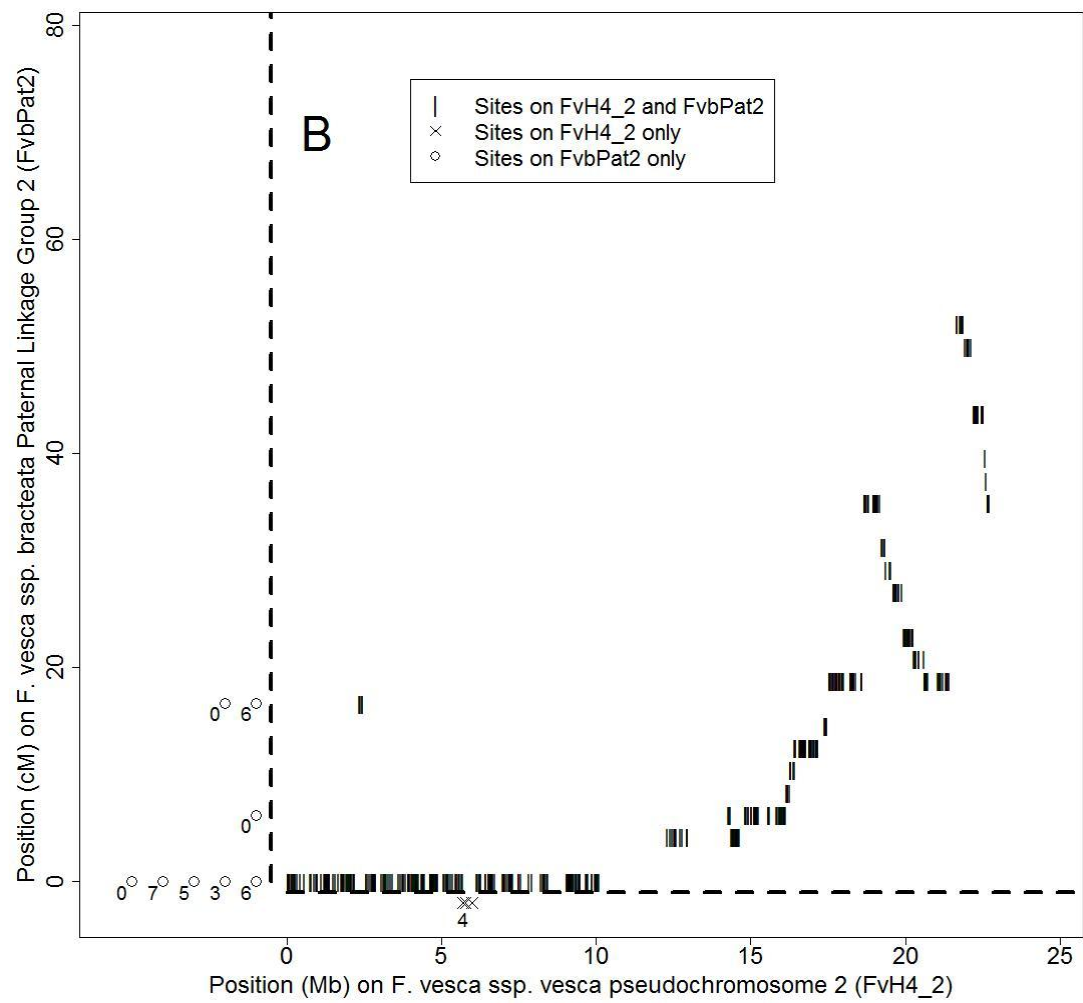

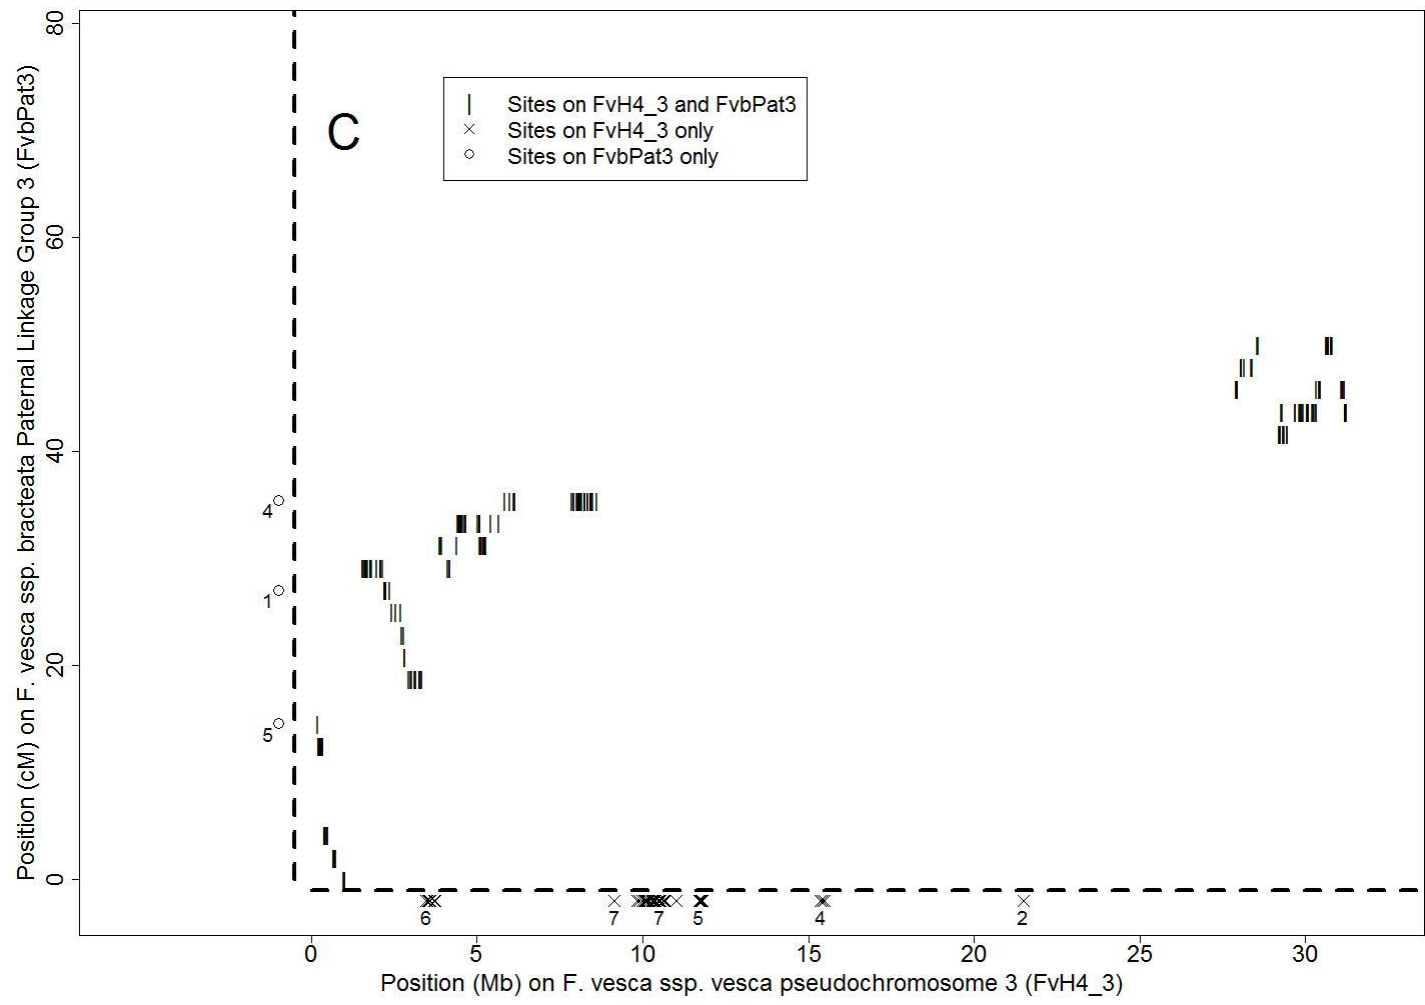





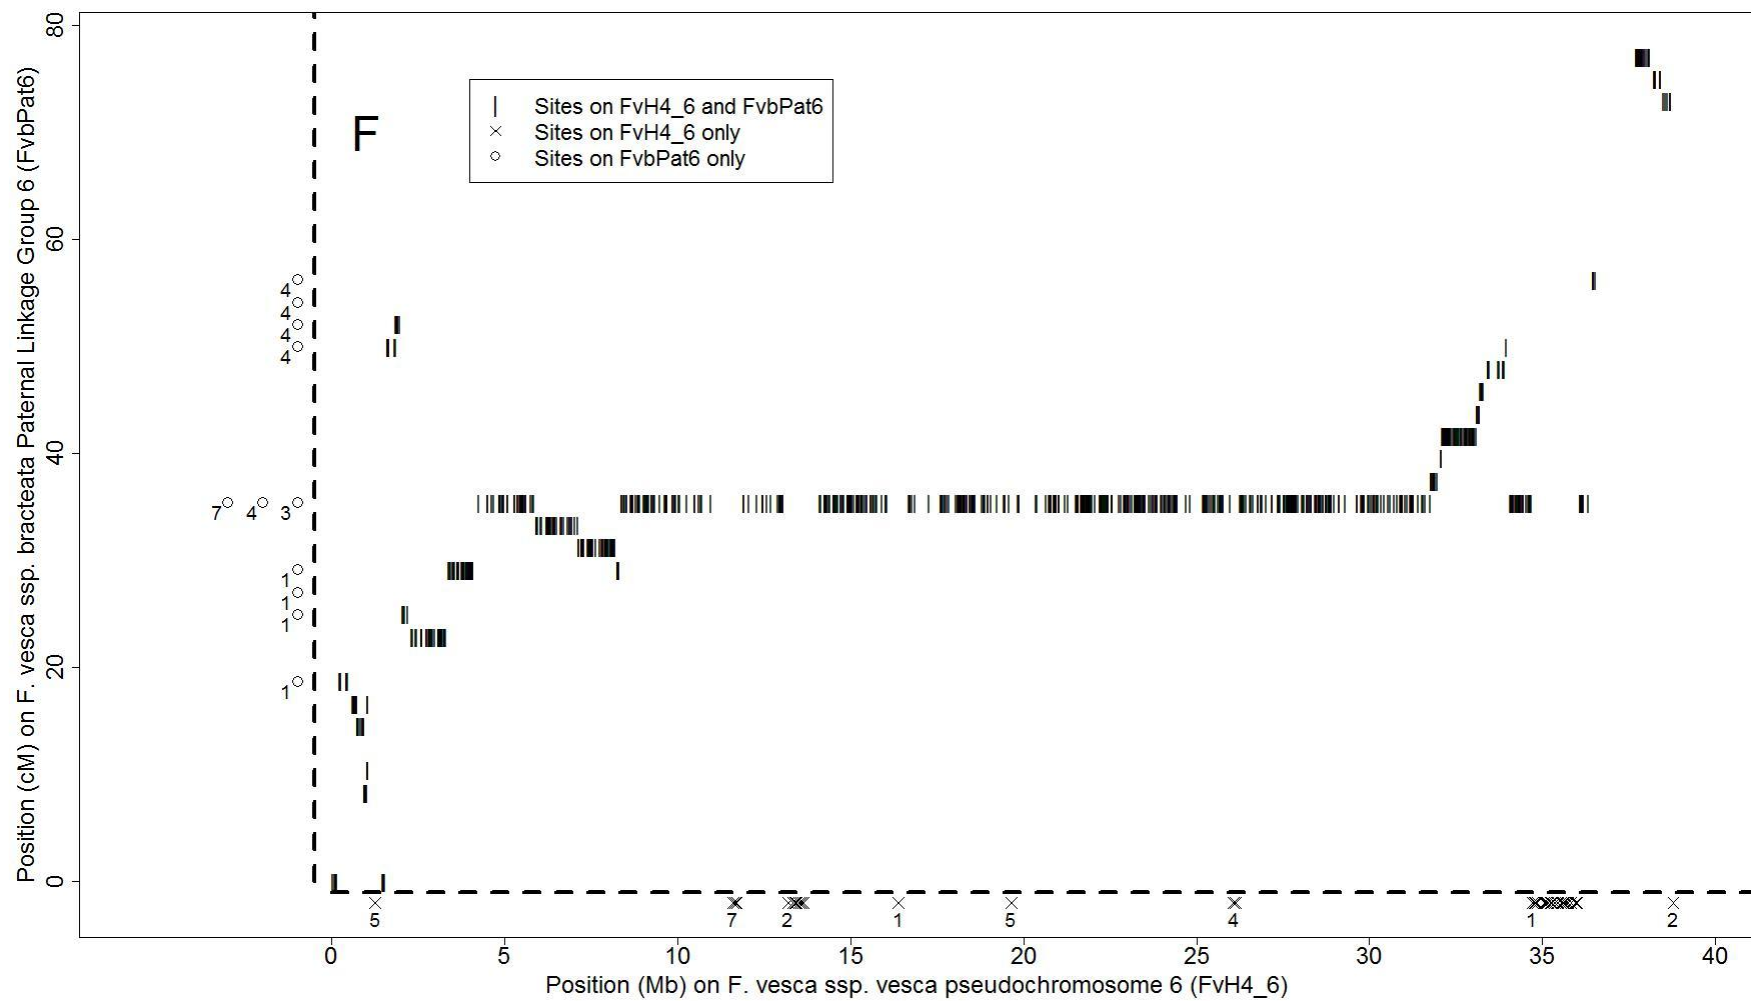

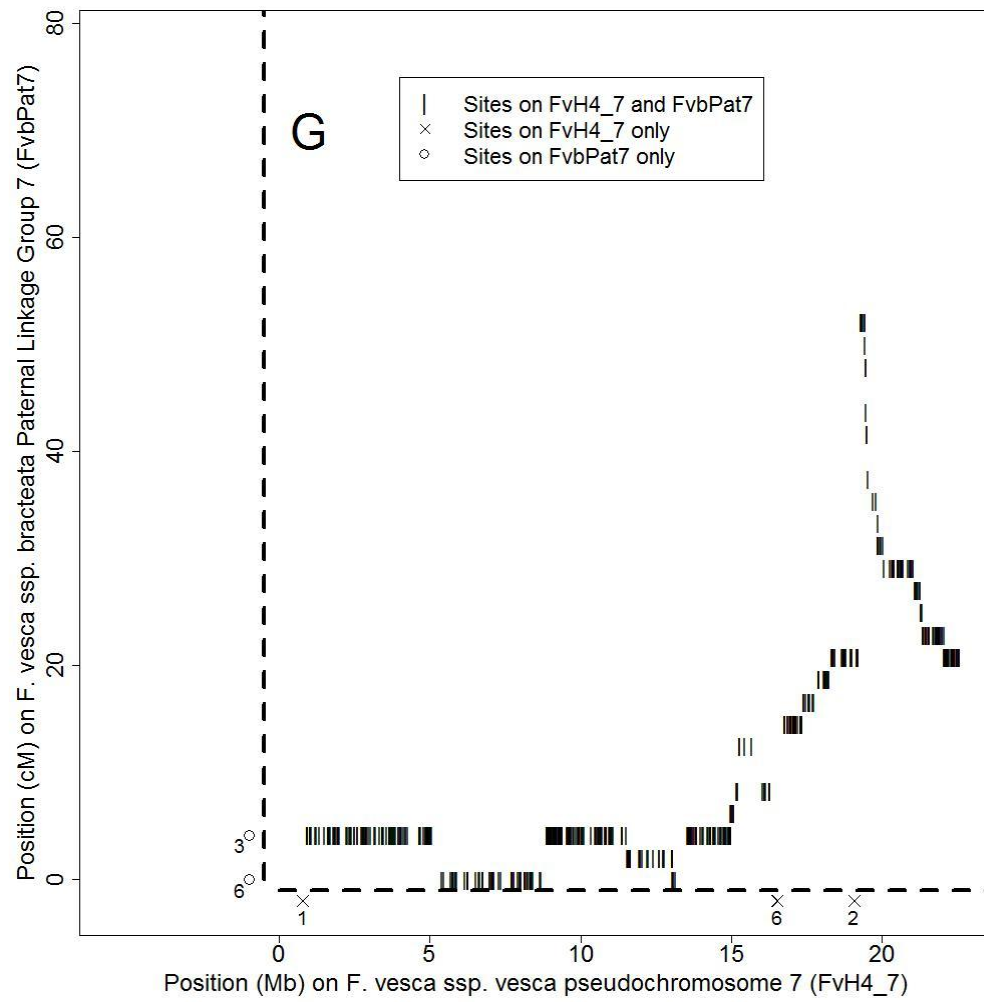

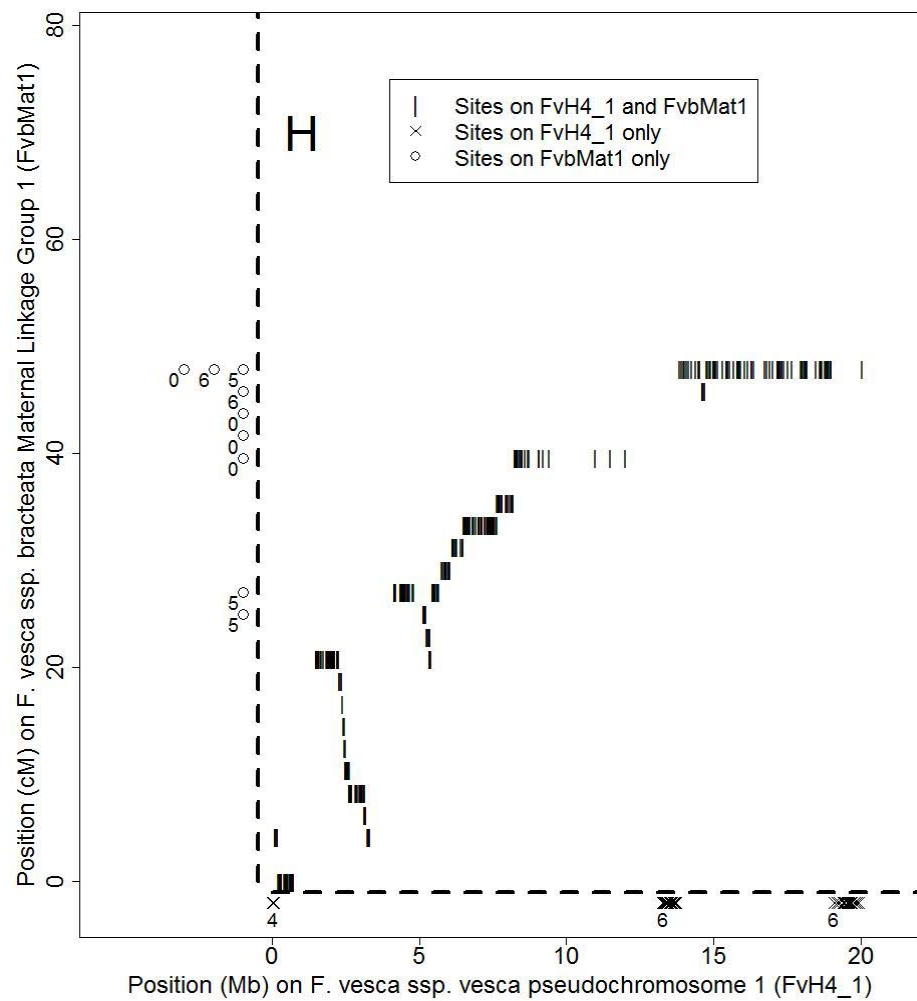



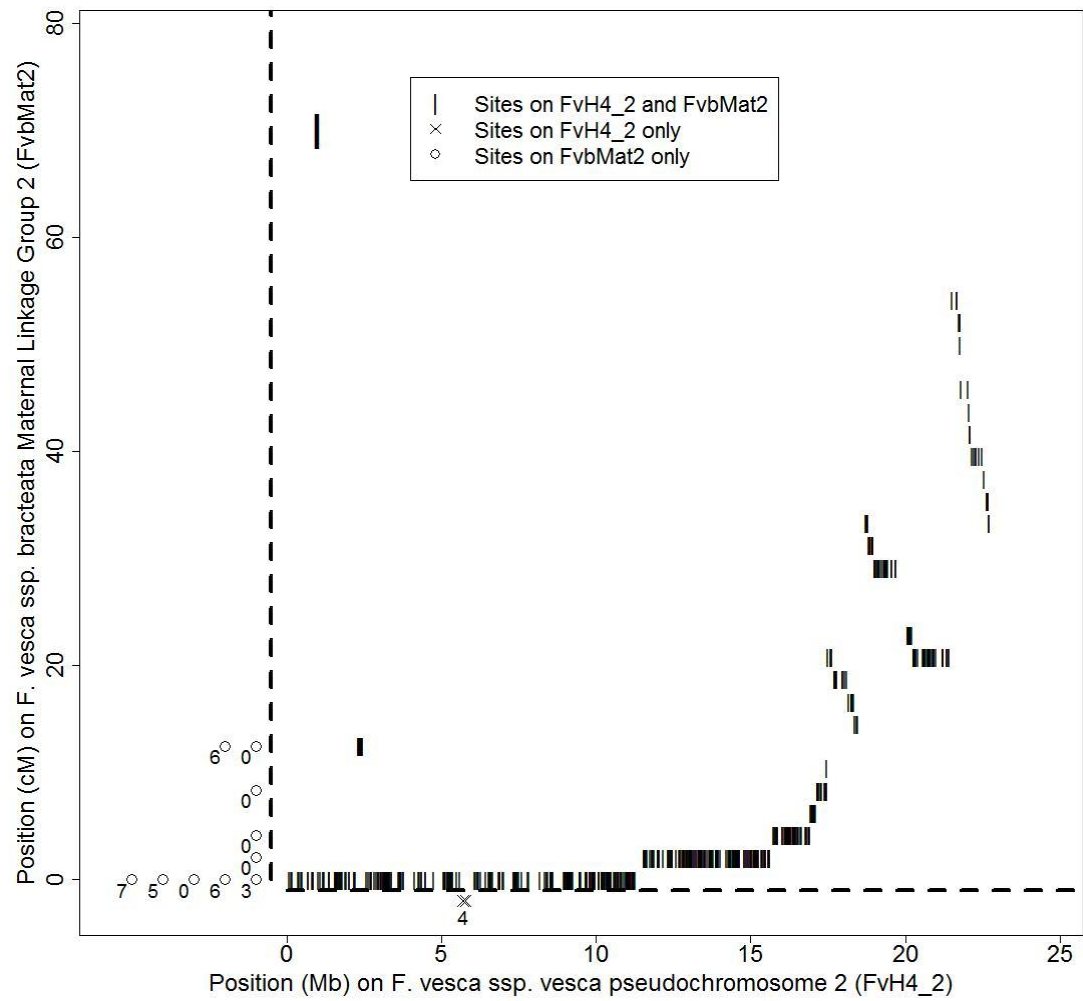

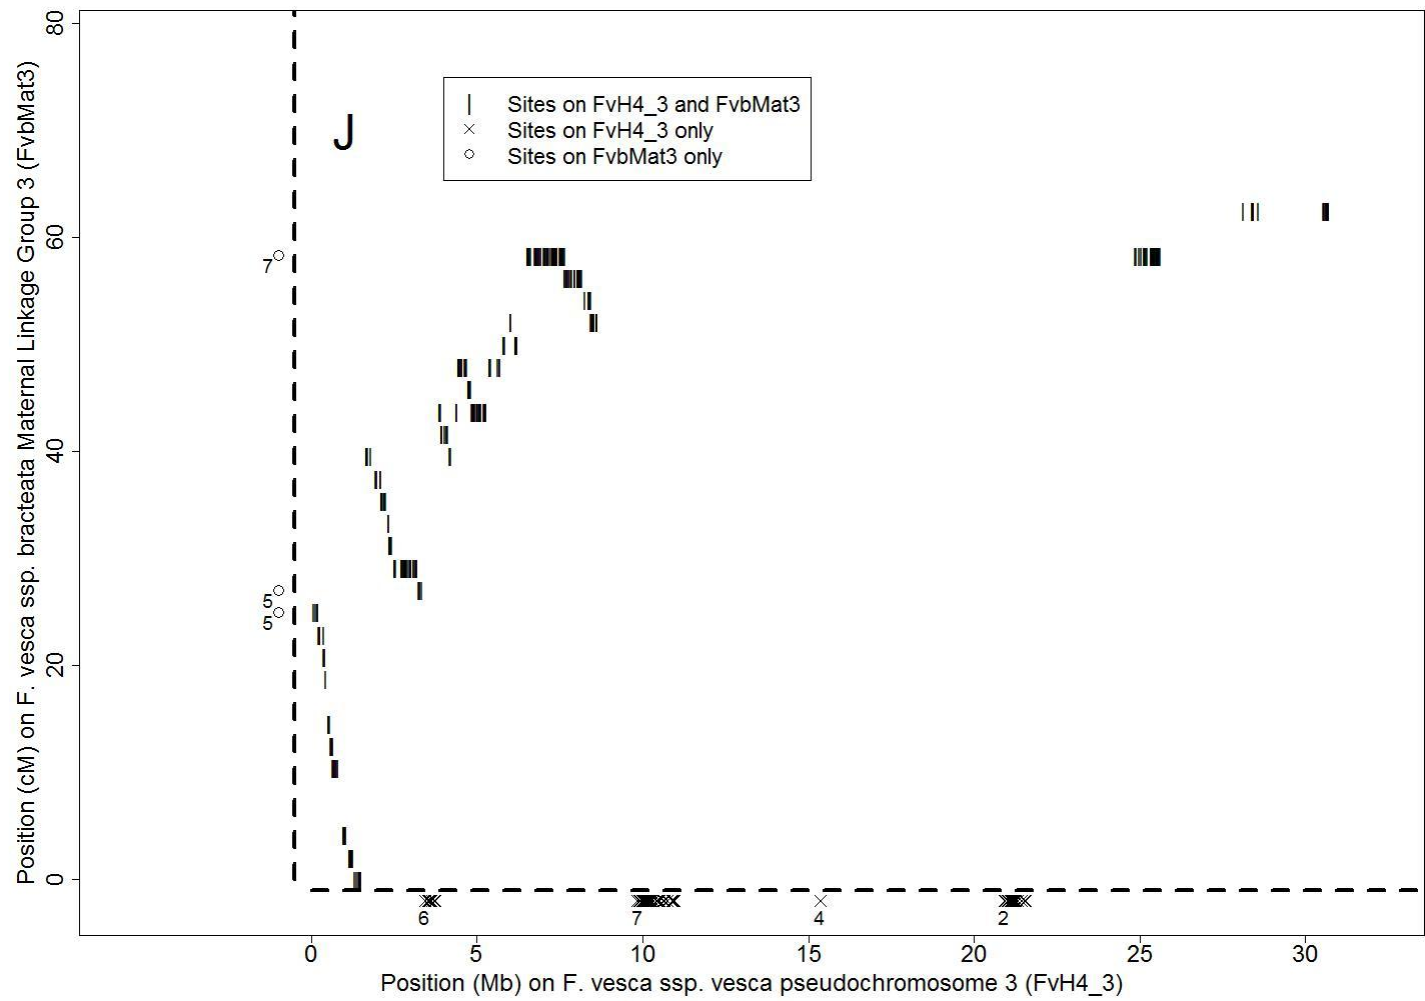



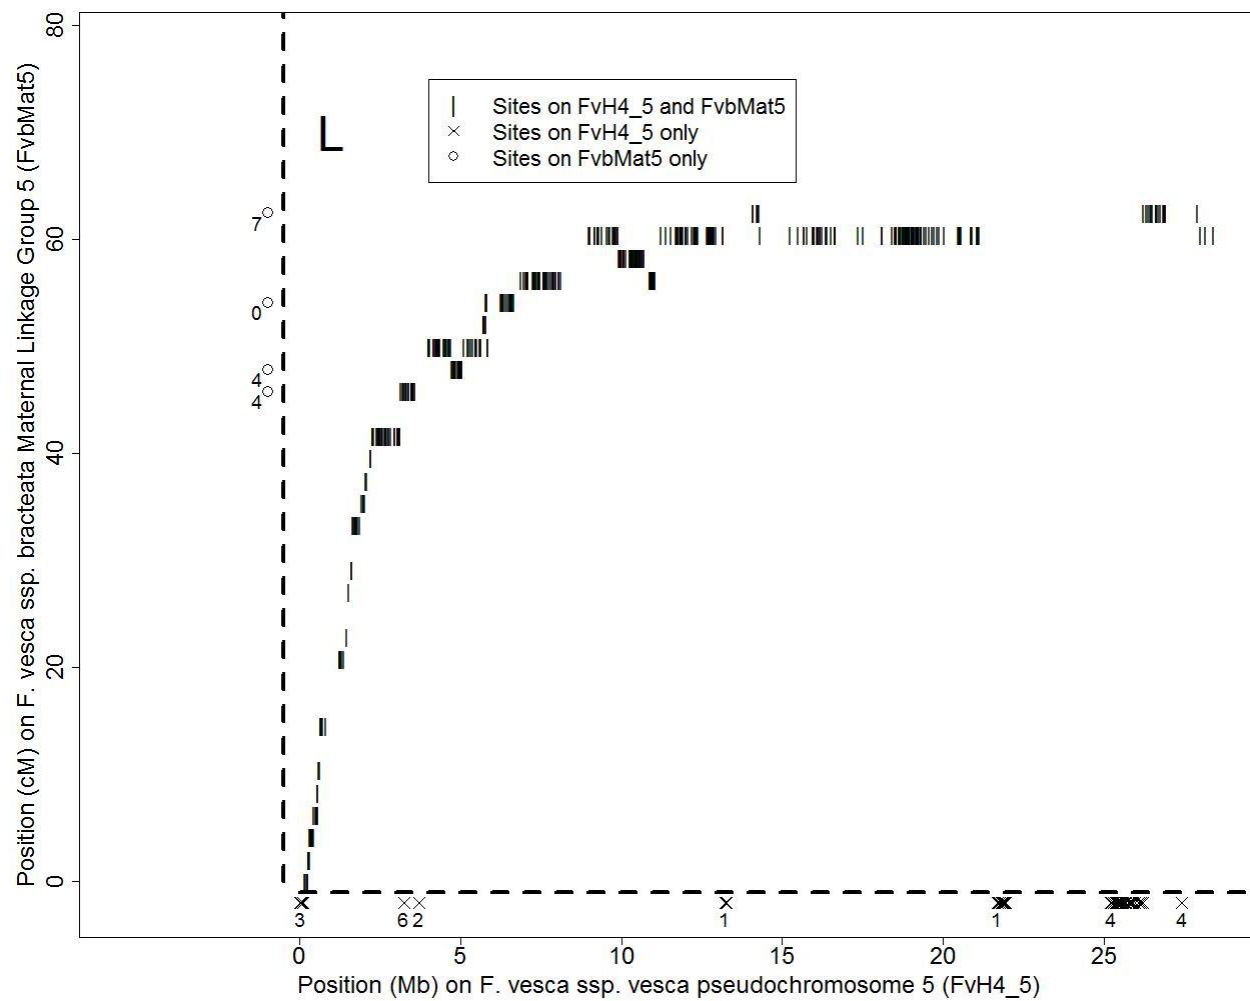

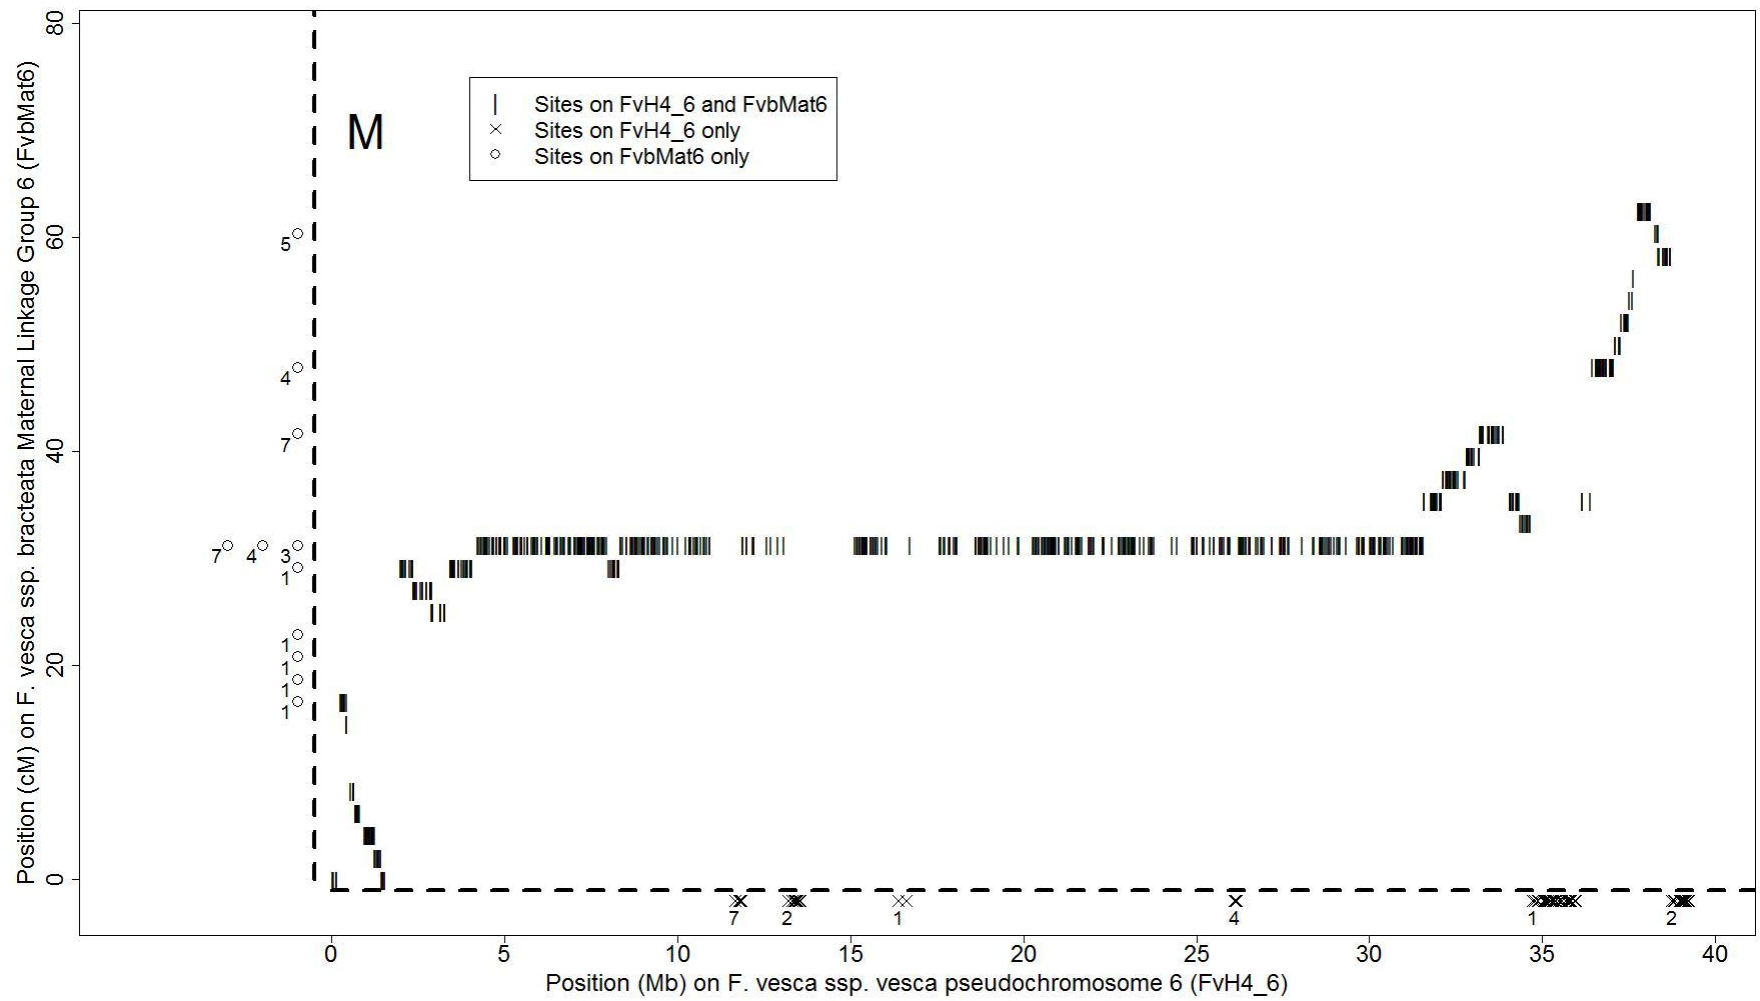

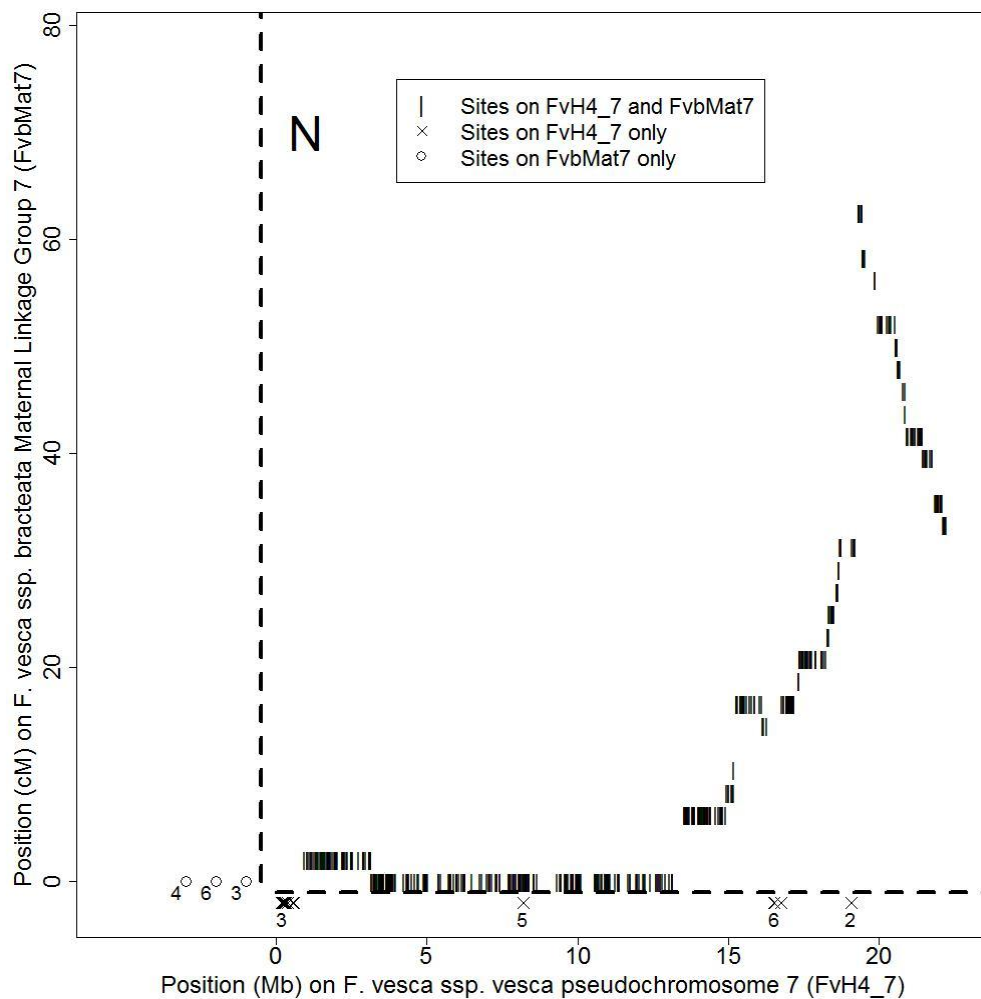

**Figure S2 (A-N)** Linkage groups in *F. vesca ssp. bracteata* plotted against the *F. vesca ssp. vesca* reference genome (FvH4). Each short vertical line represents an informative marker in our linkage map. Each linkage group is plotted against the FvH4 pseudo-chromosome with which it shares the most makers (the main pseudo-chromosome; Table 1). Markers that aligned somewhere in FvH4 other than the main pseudo-chromosome are indicated as circles on along left side of the figure, numbered according to FvH4 pseudo-chromosome. Markers that aligned to the main pseudo-chromosome but mapped to a different Fvb linkage group are indicated as x marks along the bottom of the figure, numbered according to Fvb linkage group. Markers that map to one part of the linkage group but align to a different part of the main pseudo-chromosome are within-chromosome translocations.
