# Supplementary material for: Targeted Sequence Capture Provides Insight into Genome Structure and Genetics of Male Sterility in a Gynodioecious Diploid Strawberry, Fragaria vesca ssp. bracteata (Rosaceae)
Source: PubMed Central journal article supplement (PMC3737174; doi:10.1534/g3.113.006288), 2013-08-01
Supplement: supp_g3.113.006288_TableS1.pdf [file supp_g3.113.006288_TableS1.pdf]

**Table S1 Targeted capture Illumina sequencing data for two parents and 48 offspring.**

| Plant          | Targets <sup>a</sup> | Depth <sup>b</sup> | SNP_Depth <sup>c</sup> | Indel_Depth <sup>d</sup> | Gel_Pool <sup>e</sup> | Hyb_Pool <sup>f</sup> | Flowcell | Index  | Reads      | Sex           |
|----------------|----------------------|--------------------|------------------------|--------------------------|-----------------------|-----------------------|----------|--------|------------|---------------|
| MRD60 (father) | 6570                 | 224.31             | 224.59                 | 216.4                    | 4                     | B                     | fc1025   | CGATGT | 11,902,759 | hermaphrodite |
| MRD30 (mother) | 6568                 | 114.52             | 114.97                 | 101.56                   | 1                     | D                     | fc1025   | TGACCA | 3,053,617  | female        |
| MRD30x60.79    | 6570                 | 228.44             | 228.78                 | 218.64                   | none                  | A                     | fc1022   | CGATGT | 23,134,225 | hermaphrodite |
| MRD30x60.80    | 6571                 | 229.4              | 229.75                 | 219.18                   | none                  | A                     | fc1022   | TGACCA | 24,805,423 | hermaphrodite |
| MRD30x60.85    | 6571                 | 233.47             | 233.67                 | 227.81                   | none                  | A                     | fc1022   | ACAGTG | 28,143,687 | hermaphrodite |
| MRD30x60.87    | 6571                 | 235.05             | 235.13                 | 232.72                   | none                  | A                     | fc1022   | GCCAAT | 30,114,562 | hermaphrodite |
| MRD30x60.89    | 6572                 | 231.43             | 231.69                 | 223.97                   | none                  | A                     | fc1022   | CAGATC | 23,520,462 | unknown       |
| MRD30x60.90    | 6571                 | 231.78             | 232.03                 | 224.55                   | none                  | A                     | fc1022   | ATCACG | 25,682,095 | female        |
| MRD30x60.96    | 6572                 | 234.94             | 235.17                 | 228.48                   | none                  | A                     | fc1022   | CTTGTA | 31,354,180 | female        |
| MRD30x60.102   | 6571                 | 224.6              | 224.9                  | 215.86                   | none                  | A                     | fc1022   | TTAGGC | 19,257,936 | unknown       |
| MRD30x60.1     | 6567                 | 60.82              | 61.1                   | 52.8                     | 5                     | C                     | fc1025   | ACTTGA | 1,830,233  | hermaphrodite |
| MRD30x60.2     | 6567                 | 93.89              | 94.35                  | 80.5                     | 10                    | E                     | fc1025   | GATCAG | 3,037,486  | unknown       |
| MRD30x60.3     | 6570                 | 154.37             | 154.94                 | 137.76                   | 11                    | D                     | fc1025   | TAGCTT | 5,129,835  | hermaphrodite |
| MRD30x60.4     | 6564                 | 35.31              | 35.49                  | 30.21                    | 6                     | B                     | fc1025   | GGCTAC | 986,925    | female        |
| MRD30x60.6     | 6570                 | 135.11             | 135.63                 | 120.21                   | 11                    | D                     | fc1025   | AGTCAA | 4,247,282  | female        |
| MRD30x60.7     | 6571                 | 149.3              | 149.92                 | 131.68                   | 11                    | D                     | fc1025   | AGTTCC | 4,963,971  | female        |
| MRD30x60.14    | 6568                 | 114.1              | 114.59                 | 100.16                   | 11                    | D                     | fc1025   | ATGTCA | 3,423,053  | unknown       |
| MRD30x60.15    | 6559                 | 41.04              | 41.19                  | 36.81                    | 9                     | C                     | fc1025   | CCGTCC | 1,219,685  | hermaphrodite |
| MRD30x60.16    | 6571                 | 131.83             | 132.44                 | 114.24                   | 12                    | E                     | fc1025   | GTAGAG | 3,673,595  | female        |
| MRD30x60.17    | 6571                 | 116.42             | 117                    | 99.93                    | 8                     | E                     | fc1025   | GTCCGC | 3,262,604  | female        |
| MRD30x60.28    | 6570                 | 120.47             | 120.99                 | 105.65                   | 10                    | E                     | fc1025   | GTGAAA | 3,780,144  | hermaphrodite |
| MRD30x60.29    | 6568                 | 76.03              | 76.45                  | 63.89                    | 8                     | E                     | fc1025   | GTGGCC | 2,118,379  | hermaphrodite |
| MRD30x60.34    | 6571                 | 123.23             | 123.8                  | 106.76                   | 12                    | E                     | fc1025   | GTTTCG | 3,427,160  | hermaphrodite |
| MRD30x60.37    | 6570                 | 100.65             | 101.15                 | 86.35                    | 12                    | E                     | fc1025   | CGTACG | 2,804,322  | hermaphrodite |
| MRD30x60.38    | 6568                 | 76.23              | 76.57                  | 66.46                    | 12                    | E                     | fc1025   | GAGTGG | 2,108,575  | female        |
| MRD30x60.40    | 6571                 | 133.51             | 134.1                  | 116.66                   | 6                     | B                     | fc1025   | GGTAGC | 3,858,155  | female        |
| MRD30x60.44    | 6569                 | 147.61             | 148.19                 | 131.02                   | 6                     | B                     | fc1025   | ACTGAT | 4,310,075  | hermaphrodite |
| MRD30x60.45    | 6562                 | 49.09              | 49.3                   | 42.99                    | 9                     | C                     | fc1025   | ATGAGC | 1,512,152  | unknown       |
| MRD30x60.47    | 6561                 | 36.4               | 36.57                  | 31.6                     | 4                     | B                     | fc1025   | ATTCTT | 1,002,318  | female        |
| MRD30x60.49    | 6568                 | 72.02              | 72.28                  | 64.67                    | 4                     | B                     | fc1025   | CAAAAG | 1,999,772  | female        |
| MRD30x60.51    | 6569                 | 68.09              | 68.36                  | 60.16                    | 4                     | B                     | fc1025   | CAACTA | 1,891,836  | hermaphrodite |
| MRD30x60.52    | 6568                 | 99.68              | 100.1                  | 87.57                    | 5                     | C                     | fc1025   | CACCGG | 3,093,930  | hermaphrodite |
| MRD30x60.55    | 6561                 | 51.81              | 52.1                   | 43.16                    | 8                     | E                     | fc1025   | CACGAT | 1,372,967  | female        |

|              |      |        |        |        |    |   |        |        |           |               |
|--------------|------|--------|--------|--------|----|---|--------|--------|-----------|---------------|
| MRD30x60.57  | 6564 | 48.25  | 48.49  | 41.36  | 3  | D | fc1025 | CACTCA | 1,269,038 | unknown       |
| MRD30x60.58  | 6569 | 89.26  | 89.57  | 80.25  | 7  | C | fc1025 | CAGGCG | 2,871,991 | female        |
| MRD30x60.67  | 6569 | 90.48  | 90.83  | 80.21  | 2  | B | fc1025 | CATGGC | 2,469,957 | female        |
| MRD30x60.68  | 6571 | 185.9  | 186.43 | 170.51 | 10 | E | fc1025 | CATTTT | 6,282,413 | hermaphrodite |
| MRD30x60.70  | 6567 | 92.63  | 92.99  | 82.13  | 2  | B | fc1025 | CCAACA | 2,638,079 | unknown       |
| MRD30x60.71  | 6563 | 35.92  | 36.11  | 30.51  | 3  | D | fc1025 | CGGAAT | 952,421   | hermaphrodite |
| MRD30x60.72  | 6566 | 68.03  | 68.38  | 57.95  | 7  | C | fc1025 | CTAGCT | 2,034,633 | hermaphrodite |
| MRD30x60.73  | 6564 | 82.72  | 83.09  | 72.3   | 5  | C | fc1025 | CTATAC | 2,413,967 | hermaphrodite |
| MRD30x60.74  | 6569 | 104.19 | 104.58 | 92.91  | 7  | C | fc1025 | CTCAGA | 3,264,413 | unknown       |
| MRD30x60.78  | 6568 | 84.43  | 84.8   | 73.94  | 9  | C | fc1025 | GCGCTA | 2,750,451 | female        |
| MRD30x60.82  | 6570 | 144.84 | 145.37 | 129.35 | 6  | B | fc1025 | TAATCG | 4,372,706 | hermaphrodite |
| MRD30x60.84  | 6572 | 184.49 | 184.98 | 170.29 | 7  | C | fc1025 | TACAGC | 7,423,846 | female        |
| MRD30x60.88  | 6569 | 87.92  | 88.27  | 77.93  | 5  | C | fc1025 | TATAAT | 2,452,805 | female        |
| MRD30x60.92  | 6567 | 78.32  | 78.65  | 68.91  | 1  | D | fc1025 | TCATTC | 2,022,507 | hermaphrodite |
| MRD30x60.94  | 6568 | 72.72  | 73.07  | 62.55  | 1  | D | fc1025 | TCCCGA | 1,924,070 | female        |
| MRD30x60.95  | 6565 | 111.83 | 112.25 | 99.76  | 2  | B | fc1025 | TCGAAG | 3,102,468 | hermaphrodite |
| MRD30x60.100 | 6565 | 60.37  | 60.65  | 52.06  | 10 | E | fc1025 | TCGGCA | 1,877,322 | hermaphrodite |

<sup>a</sup>Number of targeted polymorphisms with nonzero depth.

<sup>b</sup>Mean depth (coverage) among all targeted polymorphisms (SNPs and indels).

<sup>c</sup>Mean depth (coverage) among all targeted SNPs.

<sup>d</sup>Mean depth (coverage) among all targeted indels.

<sup>e</sup>Prior to gel extraction, libraries were pooled in groups of 4, as indicated.

<sup>f</sup>A total of 8 or 12 libraries were pooled for a single hybridization reaction, as indicated.
