# Supplementary material for: Targeted Sequence Capture Provides Insight into Genome Structure and Genetics of Male Sterility in a Gynodioecious Diploid Strawberry, Fragaria vesca ssp. bracteata (Rosaceae)
Source: PubMed Central journal article supplement (PMC3737174; doi:10.1534/g3.113.006288), 2013-08-01
Supplement: supp_g3.113.006288_TableS2.pdf [file supp_g3.113.006288_TableS2.pdf]

**Table S2 Primer sequences and scaffold coordinates for nine informative polymorphic sites.** These were identified from the low-coverage genome sequences of the parents on scaffold scB (scf0513158 positions 2,258,778-4,674,928). The phenotyped targeted capture offspring (N=40) and additional offspring from the cross (N=55) with known sexual phenotypes were genotyped at these informative sites by Sanger sequencing (Figure 5).

| Locus       | Scaffold coordinates <sup>a</sup> | Forward/ Reverse primer sequences (5' - 3') | Annealing temperature °C - Time |
|-------------|-----------------------------------|---------------------------------------------|---------------------------------|
| scB_1556471 | 1556327-1556351                   | For: GTGAATTACATGAAGGTGACTGGGG              | 54°C - 30 sec                   |
|             | 1556795-1556819                   | Rev: AAAAGGGGTCATCACATCTGGAAC               |                                 |
| scB_1644279 | 1643952-1643977                   | For: ACTACCAACTAGAGACACACATCC               | 56°C - 30 sec                   |
|             | 1644581-1644605                   | Rev: GAGAAATGATCCAAGACAGAGAGGC              |                                 |
| scB_1675672 | 1675540-1675564                   | For: TATGAAGTGGCGTAGAGAATAGGGC              | 56°C - 30 sec                   |
|             | 1675835-1675859                   | Rev: TTAGCAACAACAAAACCTGGACTC               |                                 |
| scB_1689672 | 1689392-1689416                   | For: TACGAGTTGCCTTTTGGAGGTTAGG              | 56°C - 30 sec                   |
|             | 1689726-1689750                   | Rev: TCAATTAGTCTTGGCCTTGCTTCTG              |                                 |
| scB_1711631 | 1711443-1711467                   | For: CTACAGACCAACACCGTCAAATAC               | 56°C - 30 sec                   |
|             | 1711904-1711928                   | Rev: CTTCTTCTGACCTCTCTGACTTTGC              |                                 |
| scB_1731089 | 1730768-1730793                   | For: GCCCTGTTGTAGAAATGAATCTGGAG             | 56°C - 30 sec                   |
|             | 1731360-1731383                   | Rev: TTATCCCCTACTCAGACTCAGC                 |                                 |
| scB_1776904 | 1776703-1776727                   | For: TTCATTCTCCGACTAAAGCTGC                 | 56°C - 30 sec                   |
|             | 1777051-1777076                   | Rev: CCACTCACTTTTAACCAGATGCTCAG             |                                 |
| scB_1804106 | 1803856-1803886                   | For: ATGGTAGCATAATGCCTCATATAACTAG           | 56°C - 30 sec                   |
|             | 1804266-1804293                   | Rev: GTGAGTTCTTGCCATCTTTATTCCAC             |                                 |
| scB_2027728 | 2027451-2027475                   | For: CAGTTTGTGTATGTGTTTGTGCGG               | 56°C - 30 sec                   |
|             | 2028097-2028121                   | Rev: GCATTTAGATTTCCAAGCGTTAGCC              |                                 |

<sup>a</sup>Coordinates are with respect to scB (add 2,258,777 to determine the position on scaffold scf0513158 in the *F. vesca* ssp. *vesca* reference genome version 1. 0).
