# Supplementary material for: Targeted Sequence Capture Provides Insight into Genome Structure and Genetics of Male Sterility in a Gynodioecious Diploid Strawberry, Fragaria vesca ssp. bracteata (Rosaceae)
Source: PubMed Central journal article supplement (PMC3737174; doi:10.1534/g3.113.006288), 2013-08-01
Supplement: supp_g3.113.006288_TableS3.pdf [file supp_g3.113.006288_TableS3.pdf]

**Table S3 Incongruities between FvH4 and Fvb.** Listed are scaffolds from FvH4 that map to Fvb linkage groups in ways incompatible with their assembly position in FvH4. Some of these likely represent assembly errors, while others likely represent real translocations or inversions.

| Scaffold     | Pseudochromosome | Start    | End      | Linkage_Group | Entire scaffold? <sup>a</sup> | Type                                                             |
|--------------|------------------|----------|----------|---------------|-------------------------------|------------------------------------------------------------------|
| scf0512942   | FvH4_0           | 317810   | 486710   | 4             | yes                           | assignment of unanchored scaffold                                |
| scf0512960   | FvH4_0           | 771617   | 922450   | 5             | yes                           | assignment of unanchored scaffold                                |
| scf0512975   | FvH4_0           | 932451   | 1031722  | 4             | yes                           | assignment of unanchored scaffold                                |
| scf0513018   | FvH4_0           | 1199431  | 1488070  | 2             | yes                           | assignment of unanchored scaffold                                |
| scf0513028   | FvH4_0           | 1498071  | 1647224  | 4             | yes                           | assignment of unanchored scaffold                                |
| scf0513041   | FvH4_0           | 2252495  | 2721037  | 1             | yes                           | assignment of unanchored scaffold                                |
| scf0513045   | FvH4_0           | 2731038  | 2792572  | 5             | yes                           | assignment of unanchored scaffold                                |
| scf0513068   | FvH4_0           | 2802573  | 3345236  | 2             | yes                           | assignment of unanchored scaffold                                |
| scf0513081   | FvH4_0           | 4365948  | 5638289  | 1             | yes                           | assignment of unanchored scaffold                                |
| scf0513119   | FvH4_0           | 5648290  | 6841401  | 2             | yes                           | assignment of unanchored scaffold                                |
| scf0513137   | FvH4_0           | 7326933  | 8406320  | 2             | yes                           | assignment of unanchored scaffold                                |
| scf0513148   | FvH4_0           | 9021620  | 9922368  | 2             | yes                           | assignment of unanchored scaffold                                |
| scf0513155   | FvH4_0           | 9932369  | 11179145 | 4             | yes                           | assignment of unanchored scaffold                                |
| scf0513189   | FvH4_0           | 11189146 | 11767950 | 1,2           | no                            | assignment of unanchored scaffold, interchromosome translocation |
| scf0513151   | FvH4_1           | 1        | 1445376  | 4,1           | no                            | interchromosome translocation, inversion                         |
| scf0513105   | FvH4_1           | 1455377  | 3331343  | 1             | yes                           | inversion                                                        |
| scf0513114   | FvH4_1           | 3341344  | 4120631  | 5             | yes                           | interchromosome translocation                                    |
| scf0512959   | FvH4_1           | 4829947  | 5419653  | 1,5           | no                            | inversion, interchromosome translocation                         |
| scf0513095   | FvH4_1           | 13186592 | 14572914 | 6             | no                            | interchromosome translocation                                    |
| scf0513168_1 | FvH4_1           | 17339065 | 19938125 | 3,6           | no                            | interchromosome translocation (x2)                               |
| scf0512938   | FvH4_2           | 2272727  | 2456317  | 2             | yes                           | intrachromosome translocation                                    |
| scf0513057   | FvH4_2           | 5704770  | 6000074  | 4             | yes                           | interchromosome translocation                                    |
| scf0512968   | FvH4_2           | 17482696 | 18535496 | 2             | yes                           | inversion                                                        |
| scf0513134   | FvH4_2           | 18667366 | 21445916 | 2             | yes                           | inversion                                                        |
| scf0513194   | FvH4_2           | 21455917 | 24538926 | 2             | yes                           | inversion                                                        |
| scf0513171   | FvH4_3           | 1        | 1497153  | 3             | yes                           | inversion                                                        |
| scf0513104   | FvH4_3           | 1507154  | 3362024  | 3             | yes                           | inversion                                                        |
| scf0513072   | FvH4_3           | 3372025  | 3727613  | 6             | yes                           | interchromosome translocation                                    |
| scf0513017   | FvH4_3           | 3737614  | 4232872  | 3             | yes                           | inversion                                                        |
| scf0513082   | FvH4_3           | 4410664  | 5334373  | 3             | yes                           | inversion                                                        |
| scf0513173   | FvH4_3           | 6456995  | 8718722  | 3             | yes                           | inversion                                                        |
| scf0513089   | FvH4_3           | 9045060  | 9383133  | 7             | yes                           | interchromosome translocation                                    |

|                         |        |          |          |     |     |                                          |
|-------------------------|--------|----------|----------|-----|-----|------------------------------------------|
| scf0513156              | FvH4_3 | 9809969  | 11035985 | 7   | yes | interchromosome translocation            |
| scf0513115              | FvH4_3 | 11045986 | 11903823 | 5   | yes | interchromosome translocation            |
| scf0513053              | FvH4_3 | 15204652 | 15608968 | 4   | yes | interchromosome translocation            |
| scf0513125              | FvH4_3 | 19509464 | 21597487 | 2   | yes | interchromosome translocation            |
| scf0513015              | FvH4_3 | 27880400 | 28601208 | 3   | yes | intrachromosome translocation            |
| scf0513029              | FvH4_3 | 30982798 | 31368128 | 3   | yes | inversion                                |
| scf0513065              | FvH4_4 | 1        | 206650   | 6   | yes | interchromosome translocation            |
| scf0513090              | FvH4_4 | 7833870  | 8595096  | 3   | yes | interchromosome translocation            |
| scf0513124_4            | FvH4_4 | 9525261  | 10260387 | 6   | no  | interchromosome translocation            |
| scf0513150              | FvH4_4 | 12599598 | 14043386 | 5   | no  | interchromosome translocation            |
| scf0512935              | FvH4_4 | 14053387 | 15031722 | 4   | yes | intrachromosome translocation            |
| scf0513004              | FvH4_4 | 22938187 | 23936647 | 6   | no  | interchromosome translocation            |
| scf0513025              | FvH4_4 | 23946648 | 24163290 | 4   | yes | inversion                                |
| scf0513158_4            | FvH4_4 | 24298703 | 26557413 | 7   | no  | interchromosome translocation            |
| scf0513012              | FvH4_5 | 1        | 128260   | 3   | yes | interchromosome translocation            |
| scf0513098              | FvH4_5 | 138261   | 3585757  | 6   | no  | interchromosome translocation            |
| scf0513052              | FvH4_5 | 3595758  | 3984026  | 2   | yes | interchromosome translocation            |
| scf0511962              | FvH4_5 | 5833229  | 5933781  | 5   | yes | intrachromosome translocation            |
| scf0513135              | FvH4_5 | 8572001  | 11121459 | 5   | yes | inversion                                |
| scf0513066              | FvH4_5 | 13220304 | 13294433 | 1   | yes | interchromosome translocation            |
| scf0513166              | FvH4_5 | 14797581 | 15196668 | 5   | yes | intrachromosome translocation            |
| scf0513094              | FvH4_5 | 17913724 | 20360920 | 5   | yes | inversion                                |
| scf0513146_5            | FvH4_5 | 20370921 | 21946032 | 1   | no  | interchromosome translocation            |
| scf0513187              | FvH4_5 | 23614770 | 26212222 | 4   | no  | interchromosome translocation            |
| scf0512965              | FvH4_5 | 26222223 | 26854803 | 5   | yes | intrachromosome translocation            |
| scf0513087              | FvH4_5 | 27369861 | 27940252 | 4   | no  | interchromosome translocation            |
| scf0512963 <sup>b</sup> | FvH4_5 | 27950253 | 28286745 | 5   | yes | intrachromosome translocation            |
| scf0513011 <sup>b</sup> | FvH4_5 | 28296746 | 28438568 | 5   | yes | intrachromosome translocation            |
| scf0513168_6            | FvH4_6 | 213555   | 1544462  | 5,6 | no  | interchromosome translocation, inversion |
| scf0512983              | FvH4_6 | 1554463  | 1973909  | 6   | yes | intrachromosome translocation            |
| scf0513061              | FvH4_6 | 1983910  | 3376700  | 6   | yes | inversion                                |
| scf0513177              | FvH4_6 | 4210475  | 8315614  | 6   | yes | inversion                                |
| scf0513185              | FvH4_6 | 11066533 | 11863480 | 7   | yes | interchromosome translocation            |
| scf0513196              | FvH4_6 | 13162357 | 15497570 | 2   | no  | interchromosome translocation            |
| scf0513176              | FvH4_6 | 16117078 | 18575326 | 1   | no  | interchromosome translocation            |
| scf0512952              | FvH4_6 | 19487000 | 19734822 | 5   | no  | interchromosome translocation            |

|                         |        |          |          |       |     |                                                                      |
|-------------------------|--------|----------|----------|-------|-----|----------------------------------------------------------------------|
| scf0513040              | FvH4_6 | 25990763 | 26193578 | 4     | yes | interchromosome translocation                                        |
| scf0512991              | FvH4_6 | 34044179 | 36036831 | 1, 6  | no  | interchromosome translocation,<br>intrachromosome translocation      |
| scf0512961              | FvH4_6 | 36046832 | 36389855 | 6     | yes | intrachromosome translocation                                        |
| scf0513112              | FvH4_6 | 38173164 | 39347594 | 2,6   | no  | interchromosome translocation, inversion                             |
| scf0513170              | FvH4_7 | 1        | 5155874  | 1,3,7 | no  | interchromosome translocation (x2),<br>intrachromosome translocation |
| scf0513080              | FvH4_7 | 7699732  | 8246547  | 5     | no  | interchromosome translocation                                        |
| scf0512990 <sup>c</sup> | FvH4_7 | 11408502 | 12404147 | 7     | no  | inversion                                                            |
| scf0512946 <sup>c</sup> | FvH4_7 | 12414148 | 13183493 | 7     | no  | inversion                                                            |
| scf0513113 <sup>d</sup> | FvH4_7 | 15242379 | 16658559 | 6,7   | no  | interchromosome translocation, inversion                             |
| scf0513044 <sup>d</sup> | FvH4_7 | 16668560 | 19276478 | 2,6   | no  | interchromosome translocation (x2)                                   |
| scf0513190              | FvH4_7 | 19286479 | 22556666 | 7     | yes | inversion                                                            |

<sup>a</sup>Indicates whether data are compatible with the entire scaffold, and only the entire scaffold, contributing to the incongruity. Such scaffolds may represent assembly errors.

<sup>b</sup>same translocation from FvH4\_5 to a different part of Fvb5

<sup>c</sup> same inversion on FvH4\_7

<sup>d</sup>same translocation from FvH4\_7 to Fvb6
